# Supplementary material for: Fossil Fuel CO2 Emission Signatures Over India Captured by OCO‐2 Satellite Measurements
Source: PubMed Central journal article supplement (PMC11583129; doi:10.1029/2023ef004411), 2024-11-22

# Supporting Information for “Fossil fuel CO<sub>2</sub> emission signatures over India captured by OCO-2 satellite measurements”

Vigneshkumar Balamurugan<sup>1</sup>, Jia Chen<sup>1</sup>

<sup>1</sup>Environmental Sensing and Modeling, Technical University of Munich (TUM), Munich, Germany

## **Contents of this file:**

Table S1

Table S2

**Table S1: The dates and locations of identified anomalies, reported emissions in the CB database, estimated emissions using the GP model and CS flux method, and emissions reported in EDGAR, ODIAC and CAMS biomass data for power plant cases.**

| S No | Date<br>(anomaly<br>location:<br>latitude,<br>longitude) | Power Plants Name                                                                                                                                                                                                                   | Reported<br>Emission in<br>the CB<br>database<br>(in Mt<br>Year <sup>-1</sup> ) | Emission<br>estimate<br>using GP<br>model (in<br>Mt Year <sup>-1</sup> ) | Emission<br>estimate<br>using c/s<br>emission<br>flux<br>method<br>(in Mt<br>Year <sup>-1</sup> ) | EDGAR<br>emission<br>within 50<br>km<br>upwind<br>(in Mt<br>year <sup>-1</sup> ) | ODIAC<br>emission<br>within 50<br>km<br>upwind<br>(in Mt<br>year <sup>-1</sup> ) | Biomass<br>burning<br>emission<br>within 50<br>km upwind<br>(in Mt<br>year <sup>-1</sup> ) |
|------|----------------------------------------------------------|-------------------------------------------------------------------------------------------------------------------------------------------------------------------------------------------------------------------------------------|---------------------------------------------------------------------------------|--------------------------------------------------------------------------|---------------------------------------------------------------------------------------------------|----------------------------------------------------------------------------------|----------------------------------------------------------------------------------|--------------------------------------------------------------------------------------------|
| 1.   | 23 October<br>2014<br><br>(23.95, 82.6)                  | Sasan Ultra Mega Power Project<br>Vindhyachal Power Station<br>Singrauli Super Thermal Power Station<br>Rihand Power Station<br>Anpara Power Station<br>Anpara-C Power Station<br>Renusagar Power Station                           | 84.14                                                                           | 64.78±17.66                                                              | -                                                                                                 | 101.5616                                                                         | 108.8215                                                                         | 0                                                                                          |
| 2.   | 1 February<br>2017<br><br>(23.96,<br>82.62)              | Sasan Ultra Mega Power Project<br>Vindhyachal Power Station<br>Singrauli Super Thermal Power Station<br>Rihand Power Station<br>Anpara Power Station<br>Anpara-C Power Station<br>Anpara-D Power Station<br>Renusagar Power Station | 88.37                                                                           | 114.8±33.58                                                              | -                                                                                                 | 103.8266                                                                         | 118.5322                                                                         | 0                                                                                          |

|    |                                             |                                                                                                                                                                                                                                     |       |             |            |          |          |        |
|----|---------------------------------------------|-------------------------------------------------------------------------------------------------------------------------------------------------------------------------------------------------------------------------------------|-------|-------------|------------|----------|----------|--------|
| 3. | 5 March<br>2017<br><br>(23.98,<br>82.62)    | Sasan Ultra Mega Power Project<br>Vindhyachal Power Station<br>Singrauli Super Thermal Power Station<br>Rihand Power Station<br>Anpara Power Station<br>Anpara-C Power Station<br>Anpara-D Power Station<br>Renusagar Power Station | 88.37 | 99.85±30.04 | -          | 103.8266 | 129.5251 | 0      |
| 4. | 13 January<br>2021<br><br>(23.92,<br>83.12) | Sasan Ultra Mega Power Project<br>Vindhyachal Power Station<br>Singrauli Super Thermal Power Station<br>Rihand Power Station<br>Anpara Power Station<br>Anpara-C Power Station<br>Anpara-D Power Station<br>Renusagar Power Station | 88.37 | 91.02±28.27 | 75.32±27.4 | 74.6588  | 164.7294 | 0      |
| 5. | 10 November<br>2014<br><br>(24, 82.71)      | Singrauli Super Thermal Power Station<br>Rihand Power Station<br>Anpara Power Station<br>Anpara-C Power Station<br>Renusagar Power Station                                                                                          | 44.93 | 74.13±24.71 | -          | 62.4616  | 54.6805  | 0.1802 |
| 6. | 16 January<br>2015<br><br>(18.6, 79.34)     | Ramagundam-B Power Station<br>Ramagundam Power Station                                                                                                                                                                              | 14.33 | 14.61±6.7   | 18.41±5.9  | 21.5016  | 40.4657  | 0.0526 |
| 7. | 20 December<br>2016<br><br>(18.6, 79.23)    | Ramagundam-B Power Station<br>Ramagundam Power Station<br>Pegadapalli (Jaipur Mandal) Power<br>Station                                                                                                                              | 19.49 | 10.71±3.89  | 7.92±4.31  | 20.7014  | 43.4112  | 0.0212 |

|     |                                              |                                                                                                        |       |             |             |         |         |        |
|-----|----------------------------------------------|--------------------------------------------------------------------------------------------------------|-------|-------------|-------------|---------|---------|--------|
| 8.  | 5 November<br>2017<br><br>(18.62,<br>79.24)  | Ramagundam-B Power Station<br>Ramagundam Power Station<br>Pegadapalli (Jaipur Mandal) Power<br>Station | 19.49 | 23.19±12.86 | 29.6±12.85  | 22.0493 | 42.6319 | 0.0324 |
| 9.  | 7 December<br>2017<br><br>(18.65, 79.2)      | Ramagundam-B Power Station<br>Ramagundam Power Station<br>Pegadapalli (Jaipur Mandal) Power<br>Station | 19.49 | 20.26±15.6  | 19.32±12.01 | 23.3059 | 45.2223 | 0      |
| 10. | 26 November<br>2018<br><br>(18.65,<br>79.33) | Ramagundam-B Power Station<br>Ramagundam Power Station<br>Pegadapalli (Jaipur Mandal) Power<br>Station | 19.49 | 24.16±11.69 | 24.9±13.4   | 23.6754 | 44.5287 | 0.1235 |
| 11. | 15 February<br>2020<br><br>(18.72,<br>79.33) | Ramagundam-B Power Station<br>Ramagundam Power Station<br>Pegadapalli (Jaipur Mandal) Power<br>Station | 19.49 | 18.9±4.1    | 25.2±5.36   | 22.2271 | 46.7727 | 0      |
| 12. | 16 January<br>2015<br>(20, 79)               | Chandrapur Thermal Power Station<br>Dhariwal power station<br>Ghugus power station                     | 20.19 | 12.31±9.08  | 13.4±8.8    | 29.7422 | 40.0671 | 0      |
| 13. | 22 December<br>2016<br>(19.93,<br>79.27)     | Chandrapur Thermal Power Station                                                                       | 14.42 | 12.97±8.65  | 7.3±6.2     | 25.3036 | 41.7171 | 0      |
| 14. | 25 January<br>2017<br>(21.05,<br>84.86)      | Angul Power Station<br>Talcher Kaniha Super Thermal Power<br>Station                                   | 19.54 | 23.83±10.94 | -           | 44.3551 | 69.3914 | 1.4008 |



|     |                                         |                                                                                                                                          |       |             |             |         |         |        |
|-----|-----------------------------------------|------------------------------------------------------------------------------------------------------------------------------------------|-------|-------------|-------------|---------|---------|--------|
| 15. | 15 November<br>2019<br>(20.8, 84.88)    | Angul Power Station<br>Talcher Kaniha Super Thermal Power<br>Station<br>Angul Steel Power Station                                        | 23.72 | 10.43±4.74  | -           | 16.4265 | 73.3165 | 1.5494 |
| 16. | 1 March<br>2018<br>(22.22,<br>82.48)    | Sipat Power Station                                                                                                                      | 12.95 | 14.24±8.54  | 17.13±10.46 | 25.6729 | 13.5886 | 0.2531 |
| 17. | 3 October<br>2018<br>(22.82, 69.6)      | Tata Mundra Ultra Mega Power Project<br>Mundra Thermal Power Project (Adani)                                                             | 37.07 | 51.89±12.22 | 57.04±14.92 | 2.997   | 1.268   | 0      |
| 18. | 13 January<br>2021<br>(22.16,<br>83.68) | Dongamahua Captive Power Plant<br>Tamnar Power Station                                                                                   | 18.65 | 26.29±15.85 | 25.44±15.43 | 38.8885 | 3.2841  | 0.3622 |
| 19. | 10 January<br>2018<br>(21.21,<br>79.22) | Khaperkheda power station<br>Koradi Thermal Power Station                                                                                | 17.76 | 10.65±6.74  | -           | 23.9697 | 36.7688 | 0.1410 |
| 20. | 19 November<br>2014<br>(23.3, 87.56)    | Durgapur Steel City Andal power station<br>Durgapur SAIL power station<br>Durgapur Projects Limited power station<br>Mejia power station | 20.98 | 56.77±12.98 | -           | 53.8409 | 19.6708 | 0      |
| 21. | 16 March<br>2017<br>(23.52, 87.4)       | Durgapur Steel City Andal power station<br>Durgapur SAIL power station<br>Durgapur Projects Limited power station<br>Mejia power station | 20.98 | 71.33±36.71 | -           | 76.0030 | 25.0810 | 0      |

|     |                                              |                                                                                                                                          |       |             |            |         |         |        |
|-----|----------------------------------------------|------------------------------------------------------------------------------------------------------------------------------------------|-------|-------------|------------|---------|---------|--------|
| 22. | 29 December<br>2017<br><br>(23.35,<br>87.44) | Durgapur Steel City Andal power station<br>Durgapur SAIL power station<br>Durgapur Projects Limited power station<br>Mejia power station | 20.98 | 55.38±19.3  | -          | 61.8673 | 23.0727 | 0.1210 |
| 23. | 18 January<br>2017<br>(22.62,<br>86.04)      | Jojobera Power Plant<br>Jamshedpur Works power station<br>Adityapur works power station                                                  | 5.2   | 43.26±17.16 | 53.06±9.12 | 41.4552 | 9.4802  | 0.1245 |
| 24. | 28 November<br>2020<br>(22.5, 86.14)         | Jojobera Power Plant<br>Jamshedpur Works power station<br>Adityapur works power station                                                  | 5.2   | 42.38±14.35 | 41.5±32.75 | 34.1113 | 8.0214  | 0.0979 |
| 25. | 31 October<br>2022<br>(22.64,<br>86.11)      | Jojobera Power Plant<br>Jamshedpur Works power station<br>Adityapur works power station                                                  | 5.2   | 27.04±15.88 | 36.5±28.4  | 45.9448 | 9.7384  | 0      |
| 26. | 7 January<br>2018<br>(22.74,<br>86.46)       | Jojobera Power Plant<br>Jamshedpur Works power station<br>Adityapur works power station<br>Mahadev Prasad Super Thermal Power<br>Plant   | 7.98  | 44.04±33.51 | 46.46±40.7 | 46.3038 | 10.1899 | 0.0715 |
| 27. | 30 December<br>2014<br>(23.58,<br>86.05)     | Bokaro Steel City Thermal Power Station<br>Chandrapura power station                                                                     | 7.47  | 19.79±12.69 | 11.49±7.11 | 70.8386 | 8.6428  | 0.7196 |
| 28. | 31 January<br>2015<br>(23.7, 86.54)          | Bokaro Steel City Thermal Power Station<br>Chandrapura power station                                                                     | 7.47  | 41.08±16.95 | -          | 66.6614 | 4.8155  | 0.4131 |

|     |                                          |                                                                                                         |       |             |            |         |         |        |
|-----|------------------------------------------|---------------------------------------------------------------------------------------------------------|-------|-------------|------------|---------|---------|--------|
| 29. | 18 January<br>2022<br>(23.66,<br>86.44)  | Bokaro Steel City Thermal Power Station<br>Chandrapura power station                                    | 7.47  | 47.73±22.93 | 47.67±9.32 | 80.3754 | 45.4088 | 0.7404 |
| 30. | 31 January<br>2021<br>(23.57,<br>86.58)  | Bokaro Steel City Thermal Power Station<br>Chandrapura power station<br>Santaldih Thermal Power Station | 10.11 | 61.67±32.35 | 60.3±38.8  | 91.3430 | 11.7864 | 0.4334 |
| 31. | 7 January<br>2017<br>(21.58,<br>81.66)   | Bhilai Steel power station                                                                              | 3.17  | 46.59±31.35 | 46.89±36.1 | 58.6355 | 2.9587  | 0.0309 |
| 32. | 8 February<br>2017<br>(21.26,<br>81.74)  | Bhilai Steel power station                                                                              | 3.17  | 8.05±4.88   | 8.24±6.8   | 56.8281 | 13.4112 | 0.1603 |
| 33. | 14 February<br>2019<br>(21.46,<br>81.62) | Bhilai Steel power station                                                                              | 3.17  | 11.91±11.09 | 13.93±12.7 | 58.6355 | 12.3757 | 0.0216 |
| 34. | 10 February<br>2020<br>(21.15, 81.2)     | Bhilai Steel power station                                                                              | 3.17  | 52.05±31.38 | 66.5±42.72 | 54.6881 | 14.7715 | 0.0387 |
| 35. | 4 March<br>2018<br>(15.22,<br>76.54)     | Bellary Thermal Power Station<br>JSW Vijayanagar Toranagallu power<br>station                           | 12.08 | 17.87±1.38  | 22.84±5.5  | 30.2110 | 7.4953  | 0.0440 |

|     |                                          |                                                                                                   |       |             |            |         |         |                               |
|-----|------------------------------------------|---------------------------------------------------------------------------------------------------|-------|-------------|------------|---------|---------|-------------------------------|
| 36. | 18 January<br>2019<br>(14.9, 76.21)      | Bellary Thermal Power Station<br>JSW Vijayanagar Toranagallu power<br>station                     | 12.08 | 68.85±15.82 | 64.6±6.7   | 32.7618 | 8.2091  | 0                             |
| 37. | 24 February<br>2021<br>(15.19,<br>76.54) | Bellary Thermal Power Station<br>JSW Vijayanagar Toranagallu power<br>station                     | 12.08 | 35.87±4.1   | 43.45±6.2  | 32.0224 | 7.5785  | 0.0807<br>(0.0807,<br>0.0807) |
| 38. | 24 February<br>2015<br><br>(11.45, 79.3) | Neyveli Thermal Power Station I<br>Neyveli Thermal Power Station II<br>Neyveli Zero power station | 19.36 | 37.55±9.29  | 38.8±12.15 | 36.0196 | 41.1005 | 0                             |
| 39. | 30 January<br>2017<br>(24.68,<br>76.94)  | Kawai Thermal Power Project                                                                       | 5.48  | 9.31±3.3    | 12.14±3.61 | 0.5225  | 1.0355  | 0                             |

**Table S2: The dates and locations of identified anomalies, estimated emissions using the CS flux method, and emissions reported in EDGAR, ODIAC and CAMS biomass data for non-power plant cases.**

| S No | Date<br>(anomaly location:<br>latitude,<br>longitude) | Emission estimate using CS<br>emission flux method (in<br>Mt Year <sup>-1</sup> ) | EDGAR emission within<br>50 km upwind<br>(in Mt year <sup>-1</sup> ) | ODIAC emission within<br>50 km upwind<br>(in Mt year <sup>-1</sup> ) | Biomass burning emission<br>within 50 km upwind<br>(in Mt year <sup>-1</sup> ) |
|------|-------------------------------------------------------|-----------------------------------------------------------------------------------|----------------------------------------------------------------------|----------------------------------------------------------------------|--------------------------------------------------------------------------------|
| 1.   | 12 January<br>2016<br>(27, 75.98)                     | 40.14±17.38                                                                       | 3.13                                                                 | 13.86                                                                | 0                                                                              |
| 2.   | 25 November<br>2017<br>(21.36,81.72)                  | 41.59±33.49                                                                       | 3.73                                                                 | 2.37                                                                 | 0.05                                                                           |
| 3.   | 19 January<br>2018<br>(21.76,83.21)                   | 11.18±6.56                                                                        | 2.30                                                                 | 2.04                                                                 | 0.95                                                                           |
| 4.   | 29 January<br>2018<br>(15.35,75.36)                   | 46.96 ± 6.18                                                                      | 1.23                                                                 | 1.41                                                                 | 0                                                                              |
| 5.   | 22 November<br>2018<br>(22.50,72.06)                  | 20.88 ± 12.08                                                                     | 0.54                                                                 | 0.69                                                                 | 0.51                                                                           |
| 6.   | 04 January<br>2019<br>(19.12,77.96)                   | 19.05 ± 12.82                                                                     | 0.35                                                                 | 1.93                                                                 | 0                                                                              |
| 7.   | 6 January<br>2019<br>(22.04,82.94)                    | 15.27 ± 9.63                                                                      | 1.58                                                                 | 2.89                                                                 | 0.23                                                                           |

|     |                                      |               |      |      |      |
|-----|--------------------------------------|---------------|------|------|------|
| 8.  | 28 February<br>2019<br>(28.22,76.92) | 67.58 ± 38.91 | 2.43 | 6.47 | 0    |
| 9.  | 27 March<br>2019<br>(23.72,80.69)    | 7.50 ± 3.53   | 1.22 | 1.17 | 0    |
| 10. | 24 November<br>2019<br>(21.05,83.38) | 4.68 ± 3.39   | 0.60 | 0.35 | 0    |
| 11. | 24 November<br>2019<br>(21.86,83.18) | 4.72 ± 2.50   | 3.63 | 2.08 | 0    |
| 12. | 10 February<br>2020<br>(24.48,80.30) | 5.66 ± 1.96   | 0.38 | 0.20 | 0    |
| 13. | 2 December<br>2020<br>(22.36,70.71)  | 32.10 ± 23.89 | 0.95 | 4.37 | 0    |
| 14. | 10 December<br>2020<br>(21.00,83.36) | 8.47 ± 6.25   | 0.59 | 0.37 | 0.02 |
| 15. | 8 March 2021<br>(22.18,70.68)        | 40.18 ± 25.13 | 0.37 | 1.94 | 0    |
| 16. | 29 November<br>2021<br>(21.05,83.46) | 14.10 ± 11.75 | 0.67 | 0.40 | 0    |
| 17. | 23 December<br>2022<br>(21.50,81.68) | 40.86 ± 26.66 | 6.83 | 3.50 | 0.03 |

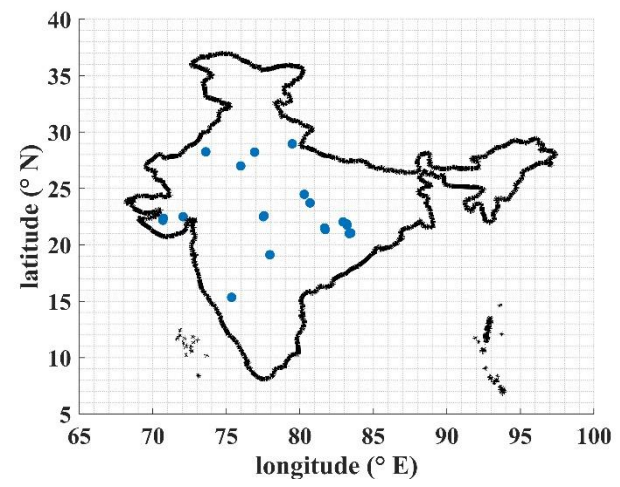

**Figure S1. Locations of the CS flux method applied for non-power plant cases.**

**Figures similar to Figure 3 for all analyzed cases are given below.**



## Cluster-1 on “1 February 2017”

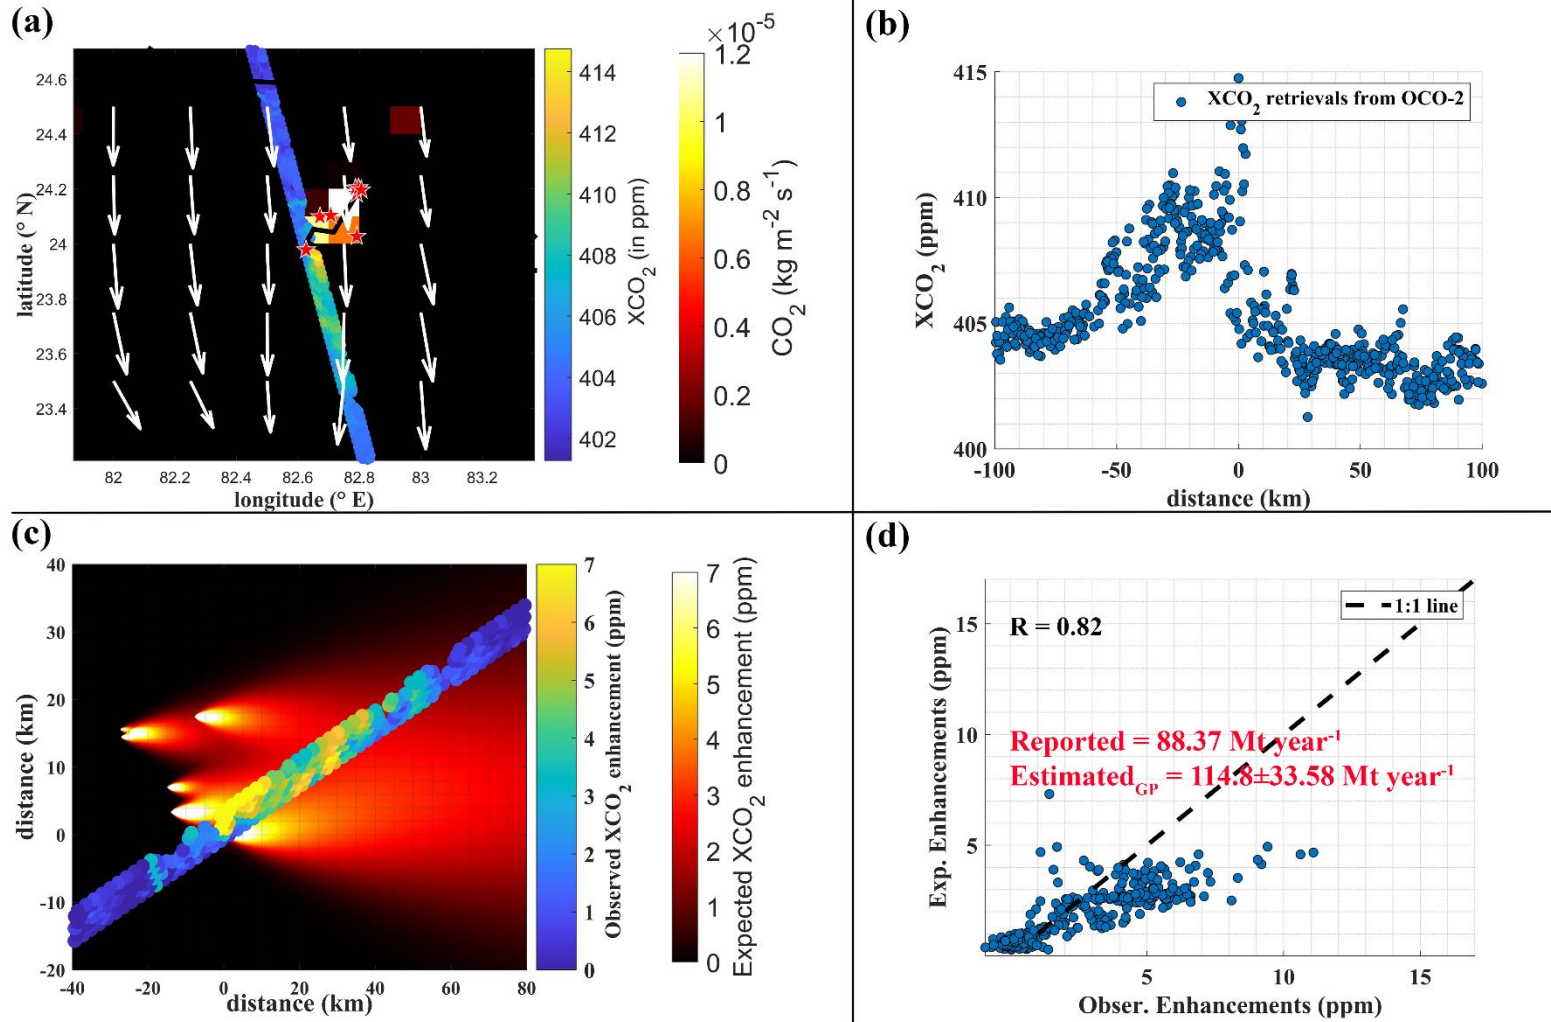

## Cluster-1 on “5 March 2017”

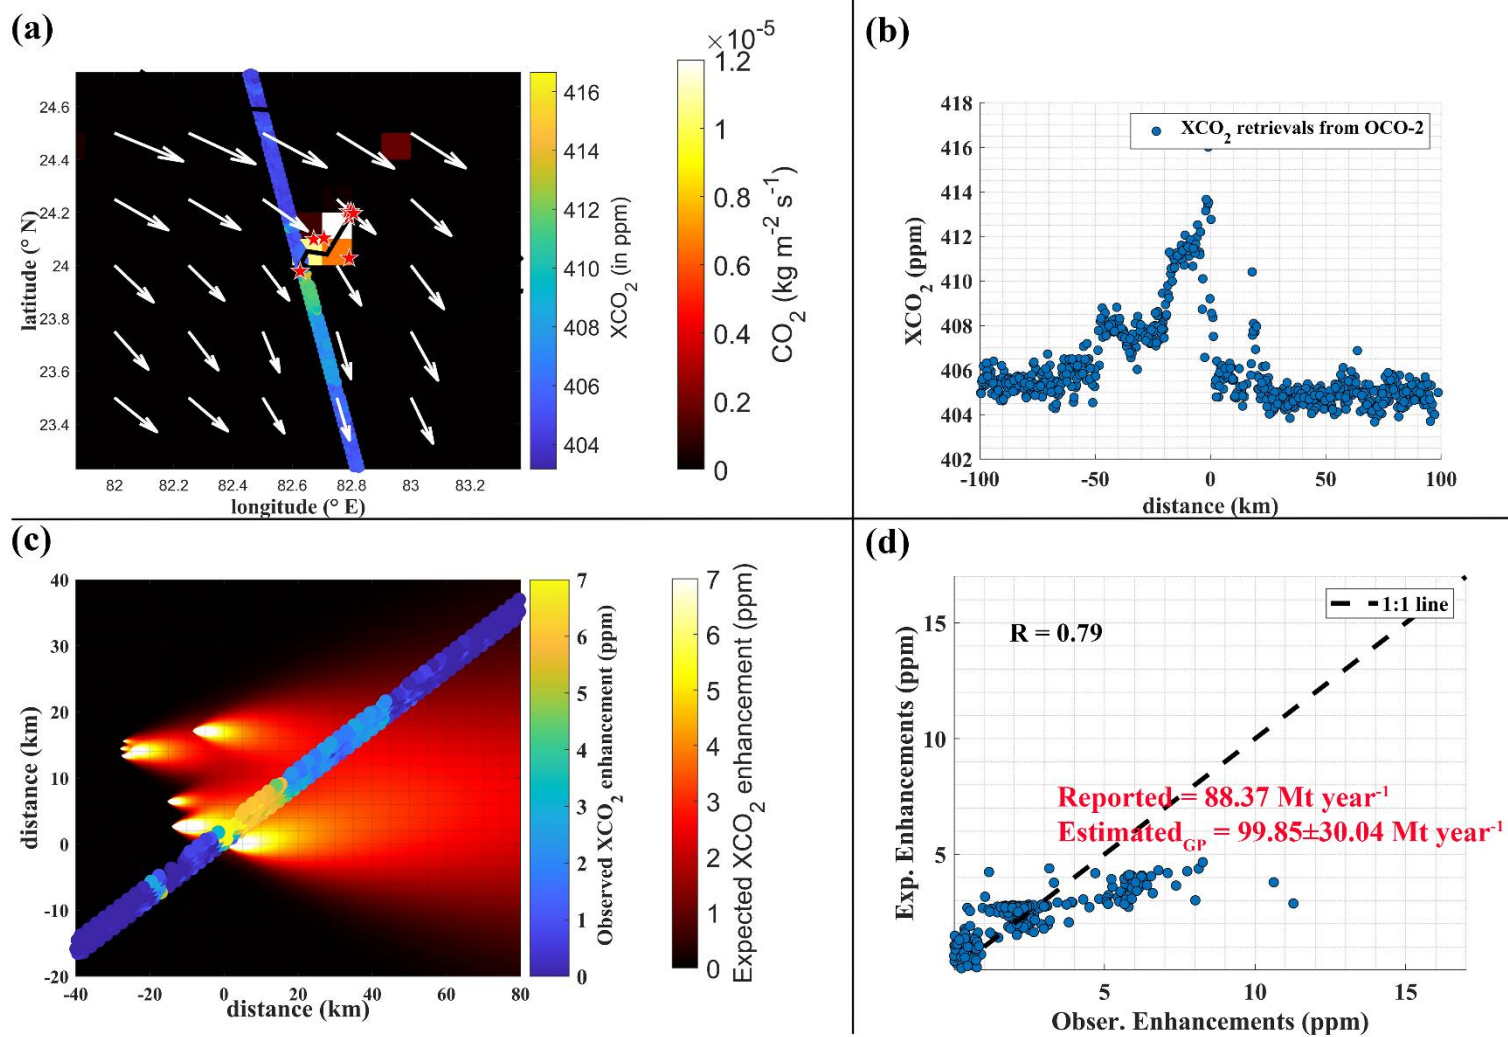

# Cluster-1 on "13 January 2021"

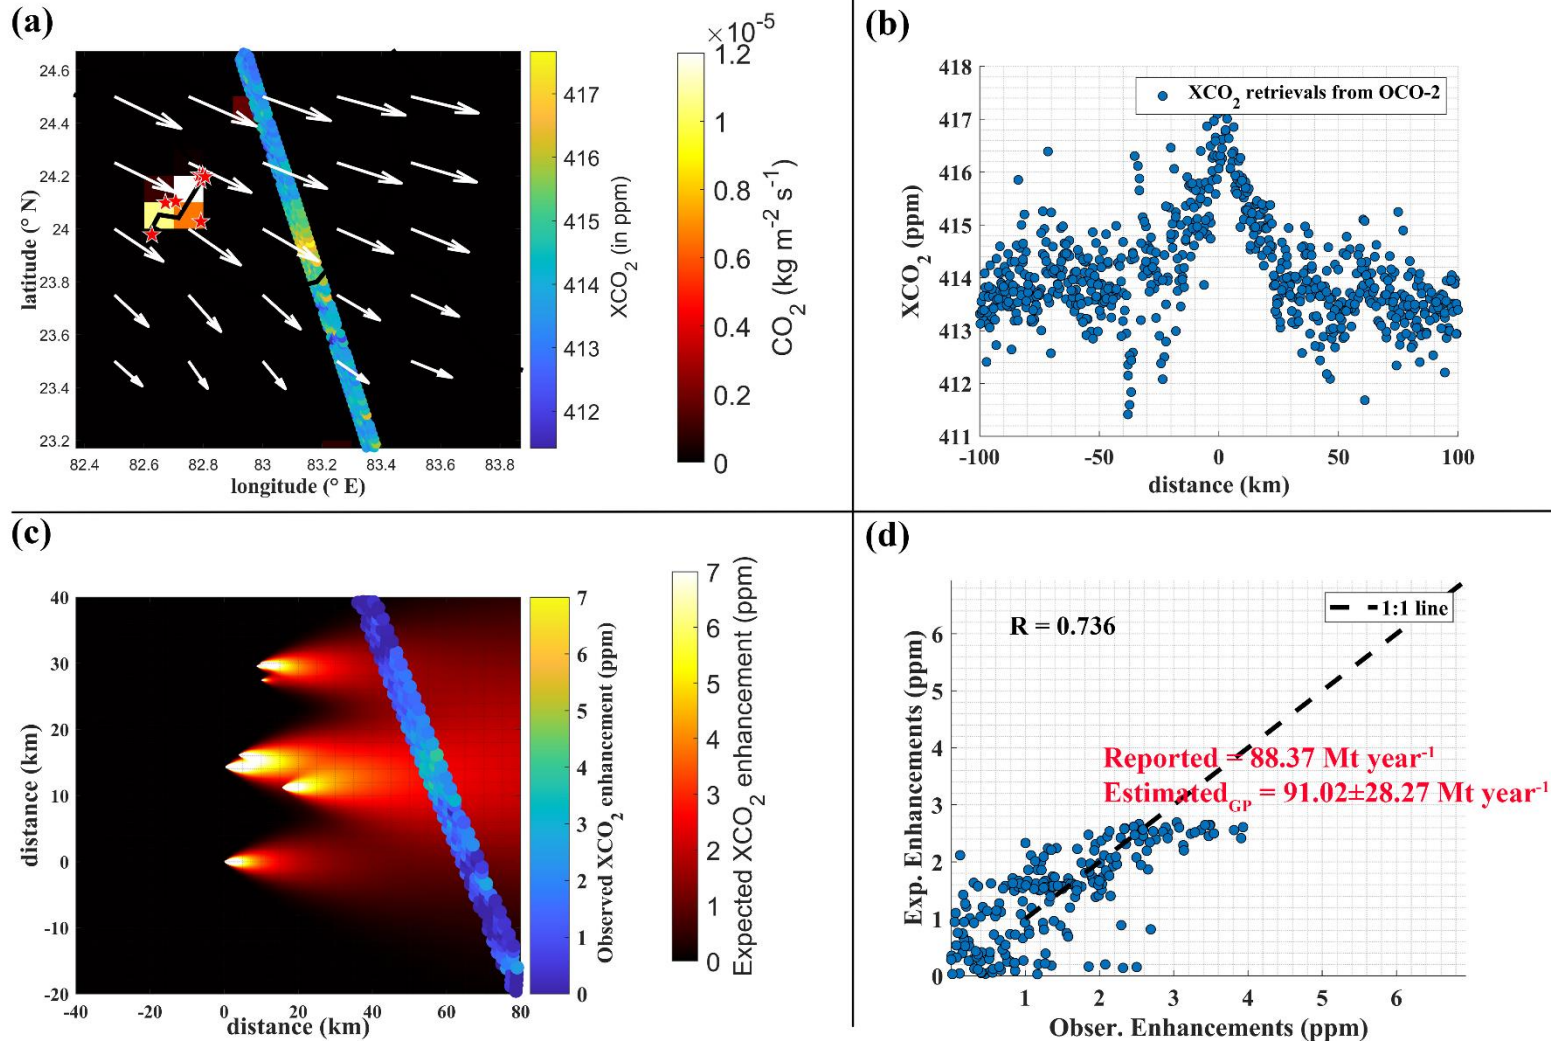

## Cluster-1 on “11 November 2014”

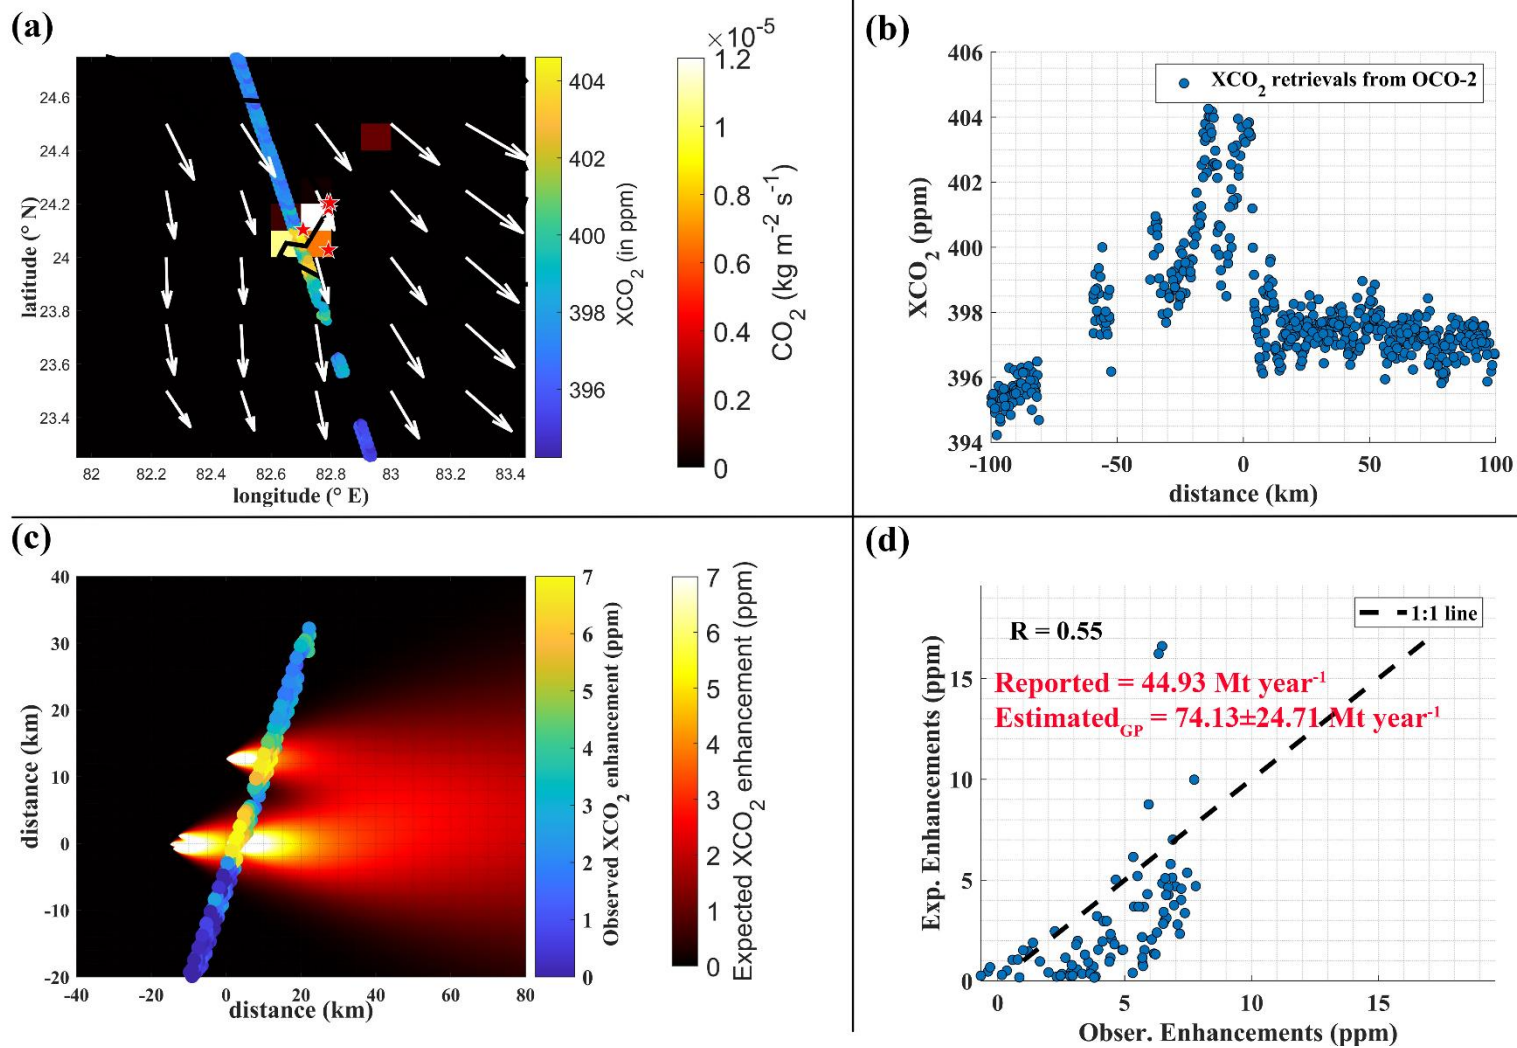



## Cluster-2 on “16 January 2015”

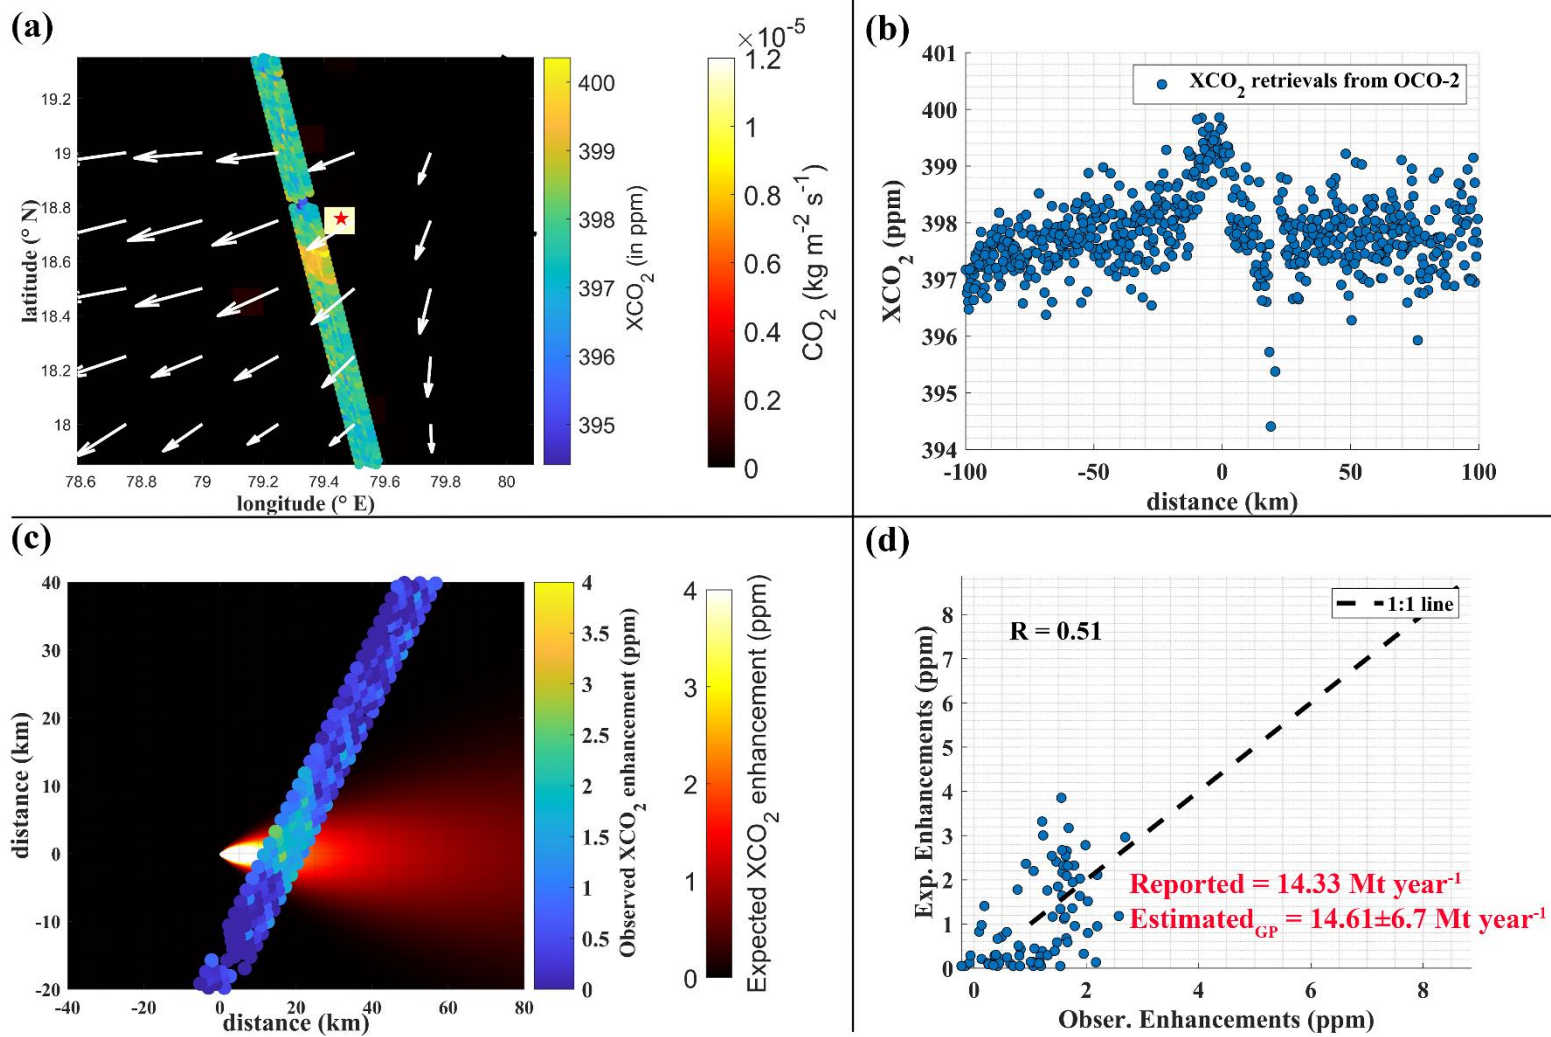

## Cluster-2 on “20 December 2016”

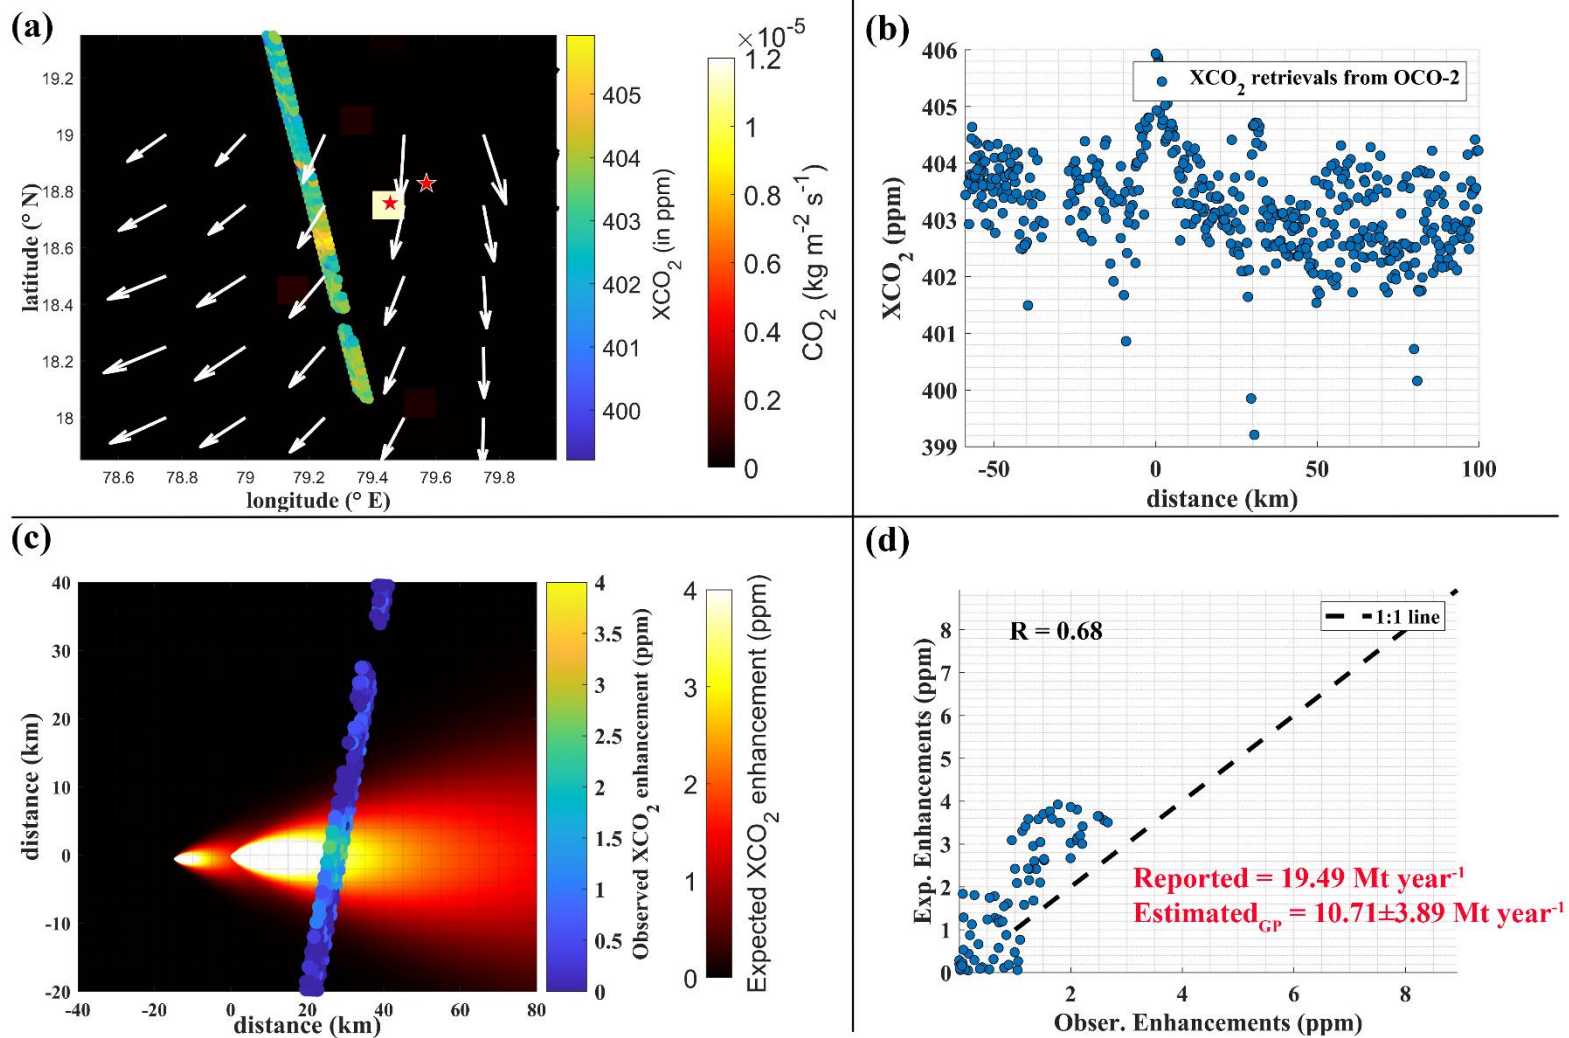

## Cluster-2 on “5 November 2017”

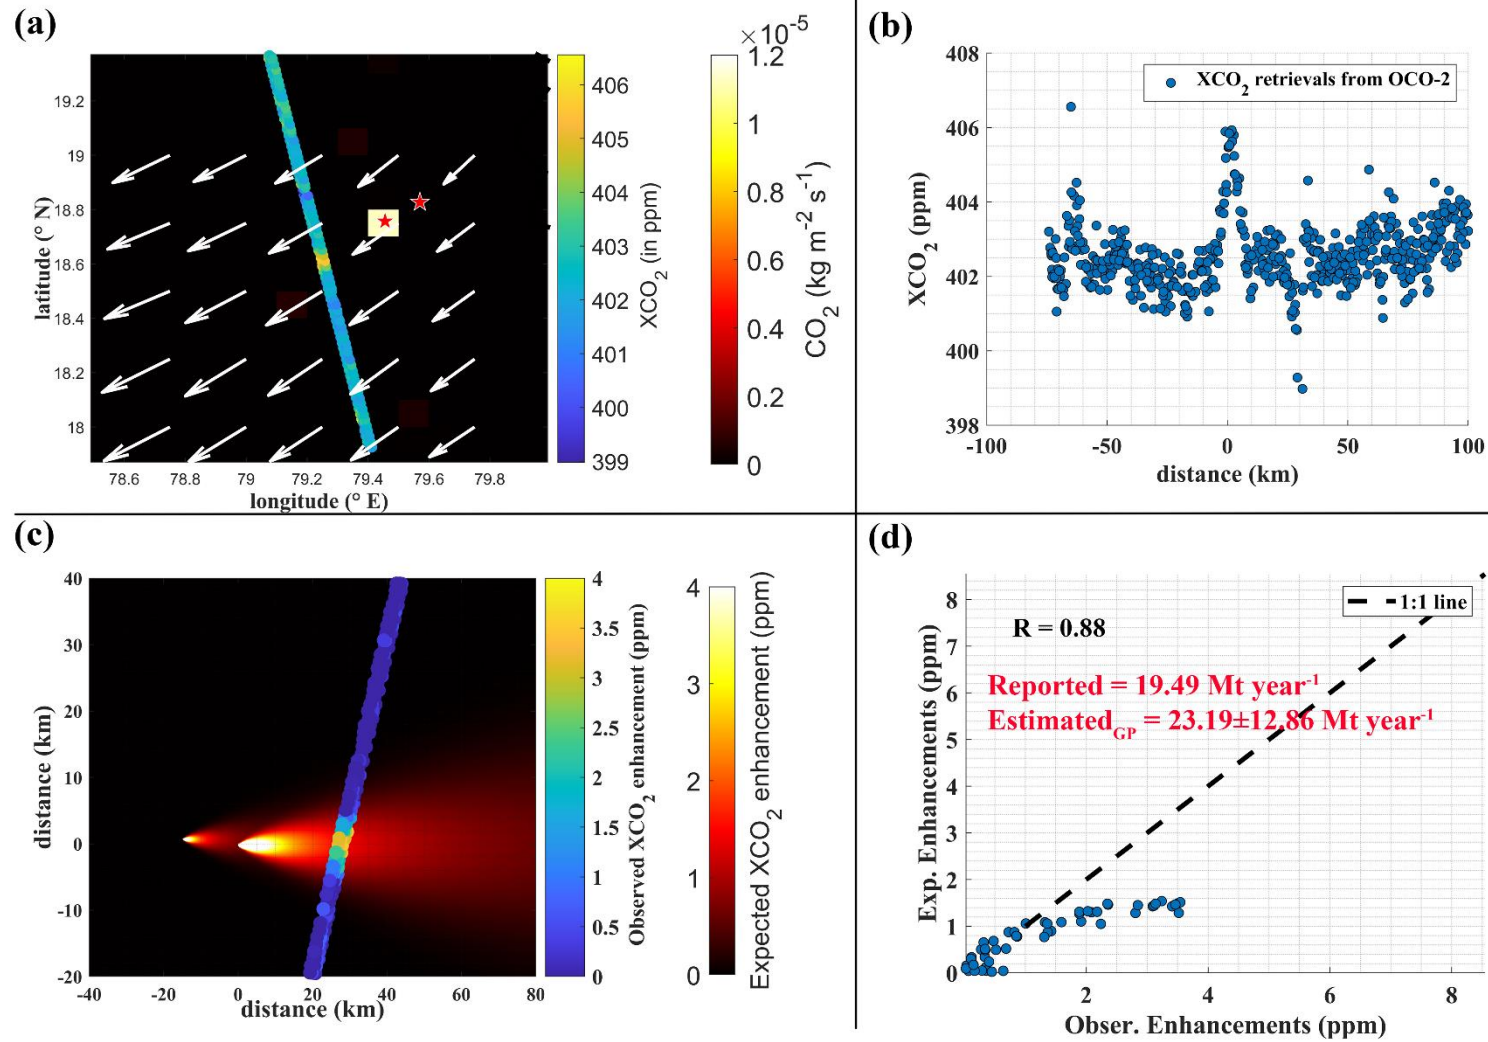



## Cluster-2 on “7 December 2017”

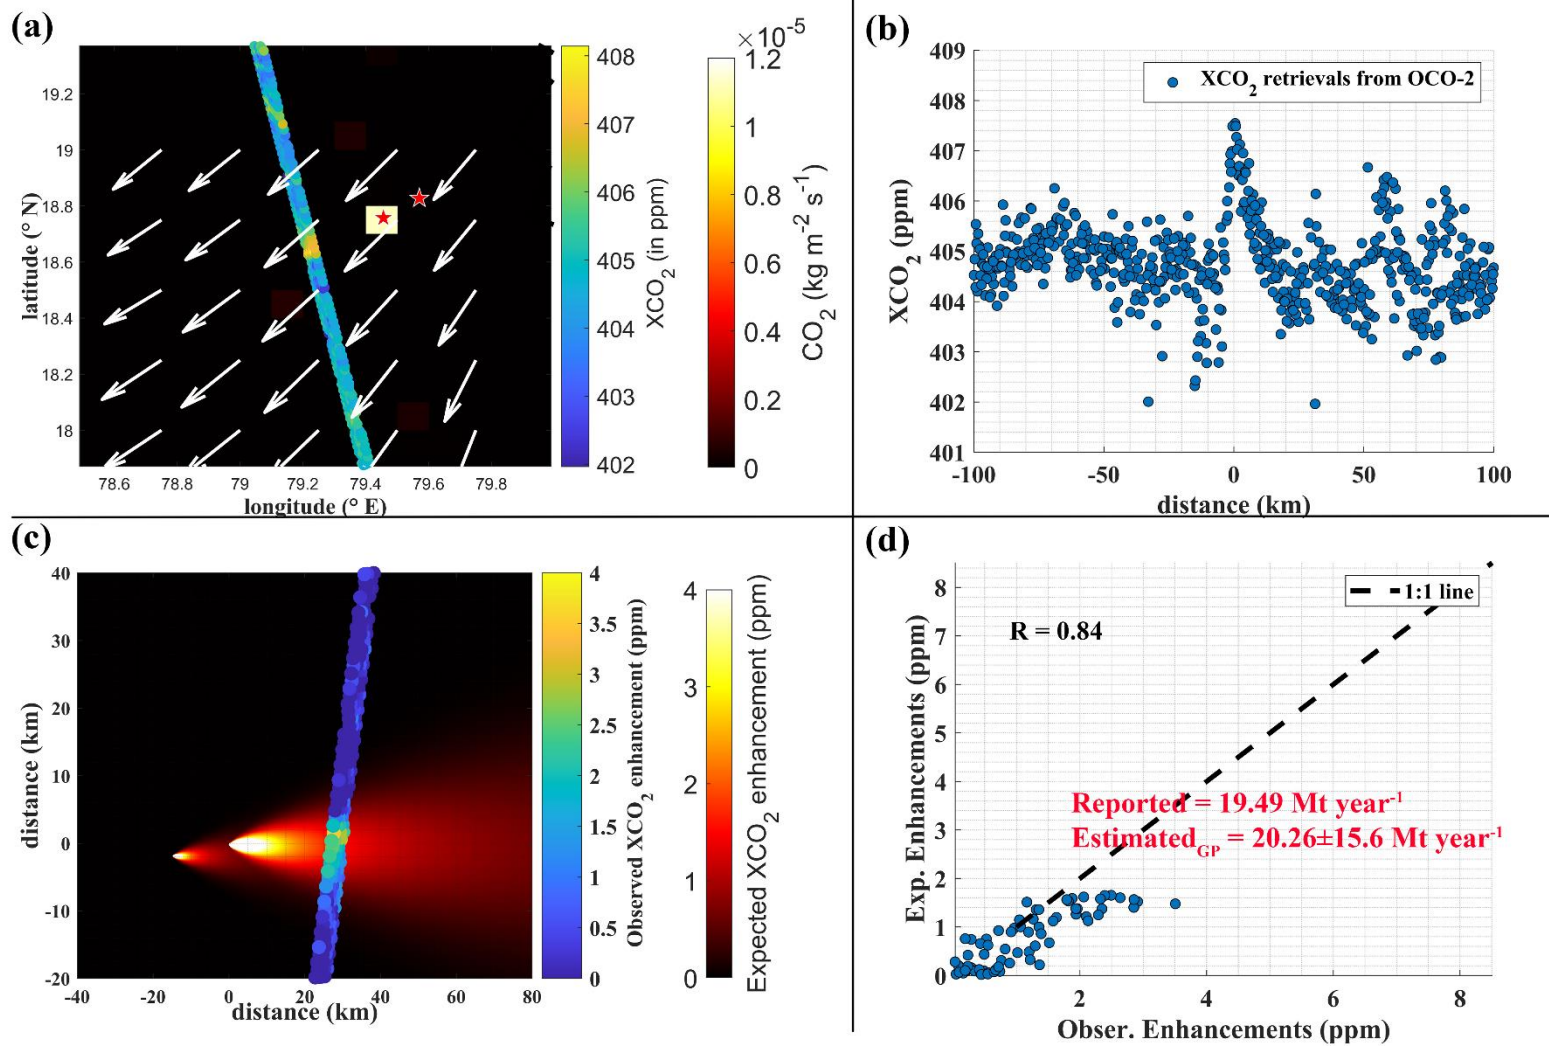



## Cluster-2 on “26 November 2018”

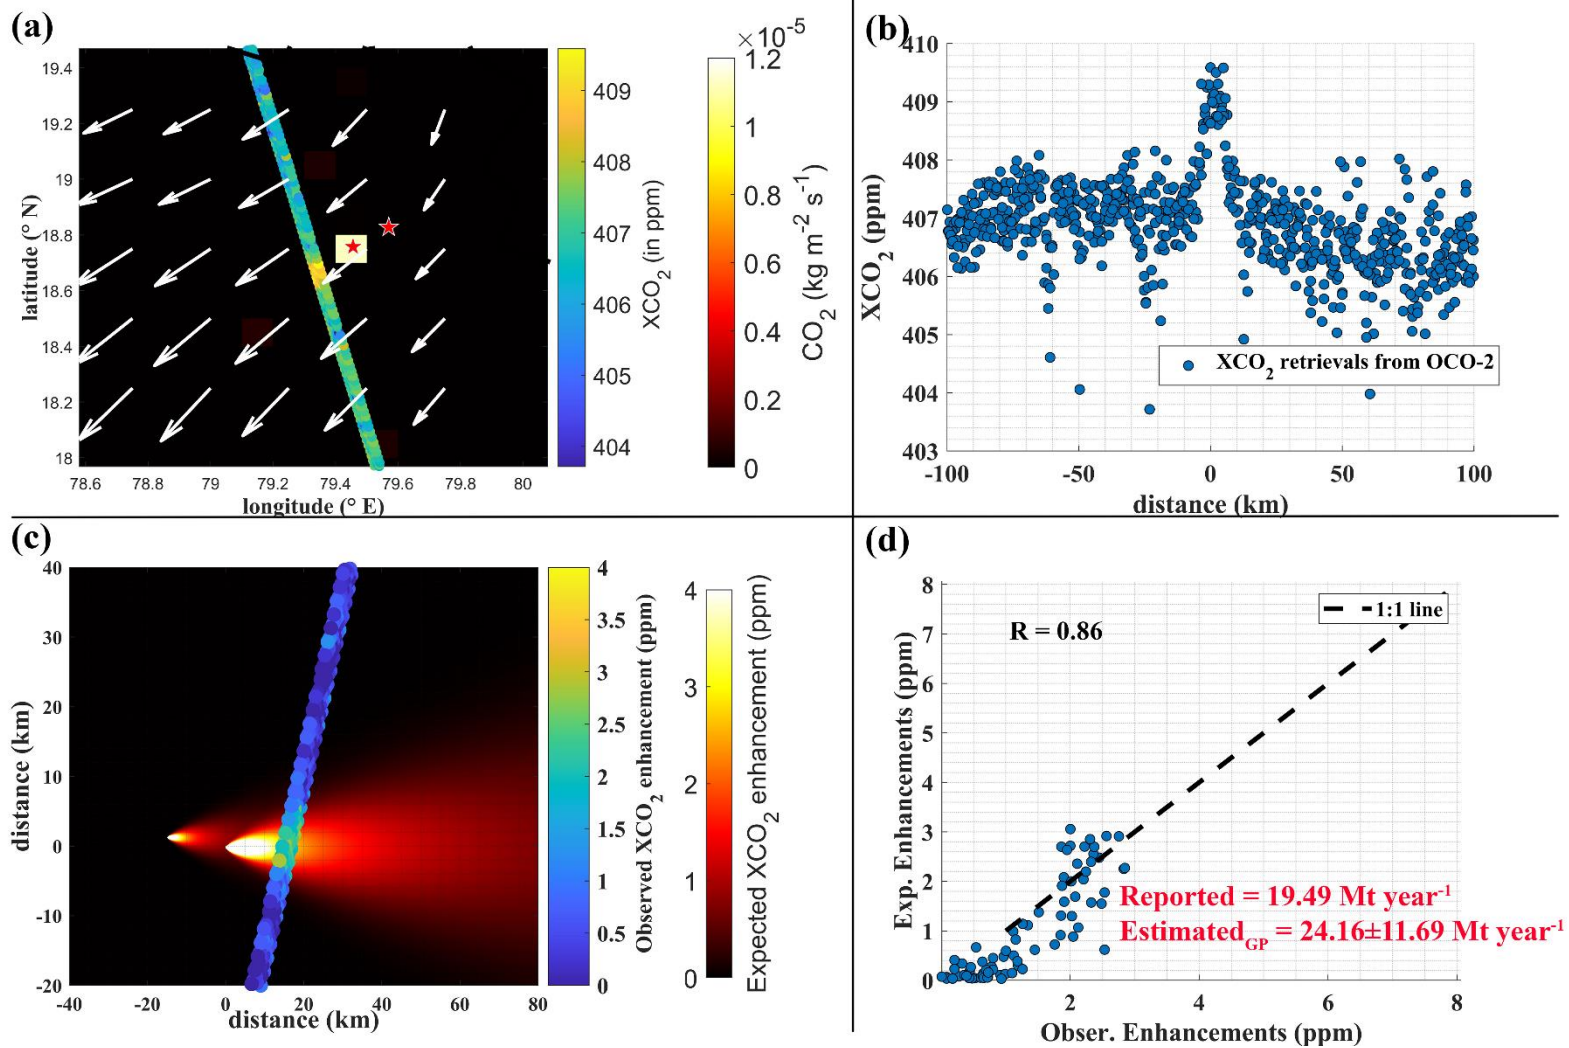

## Cluster-2 on “15 February 2020”

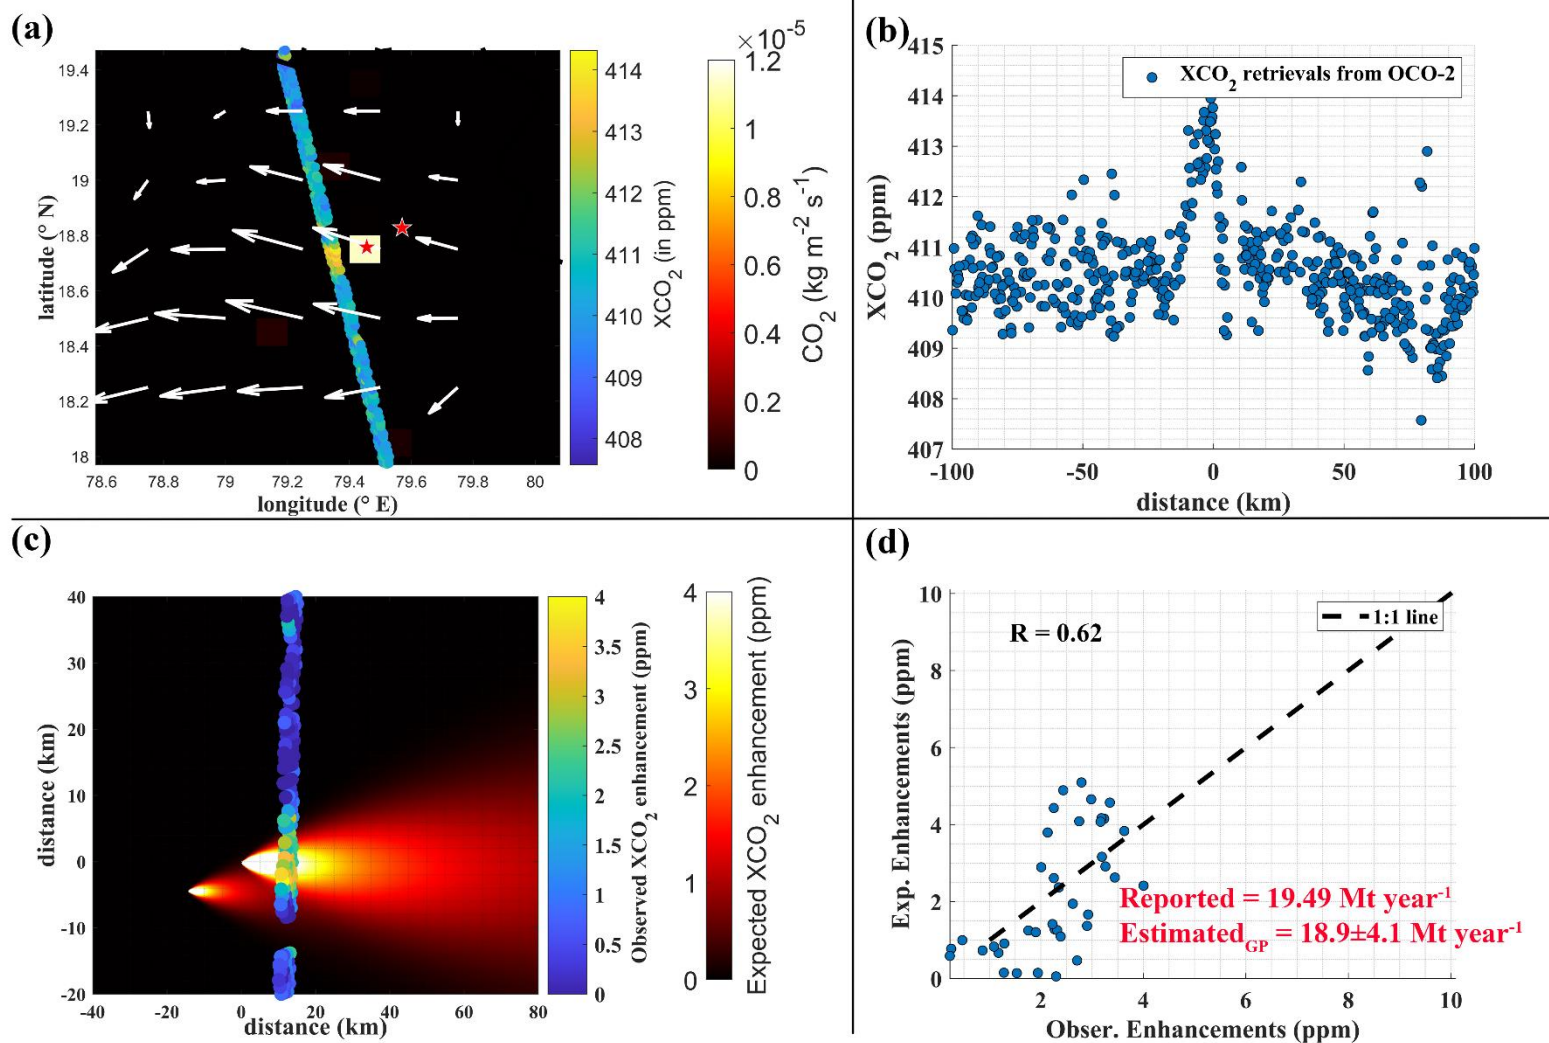

## Cluster-3 on “16 January 2015”

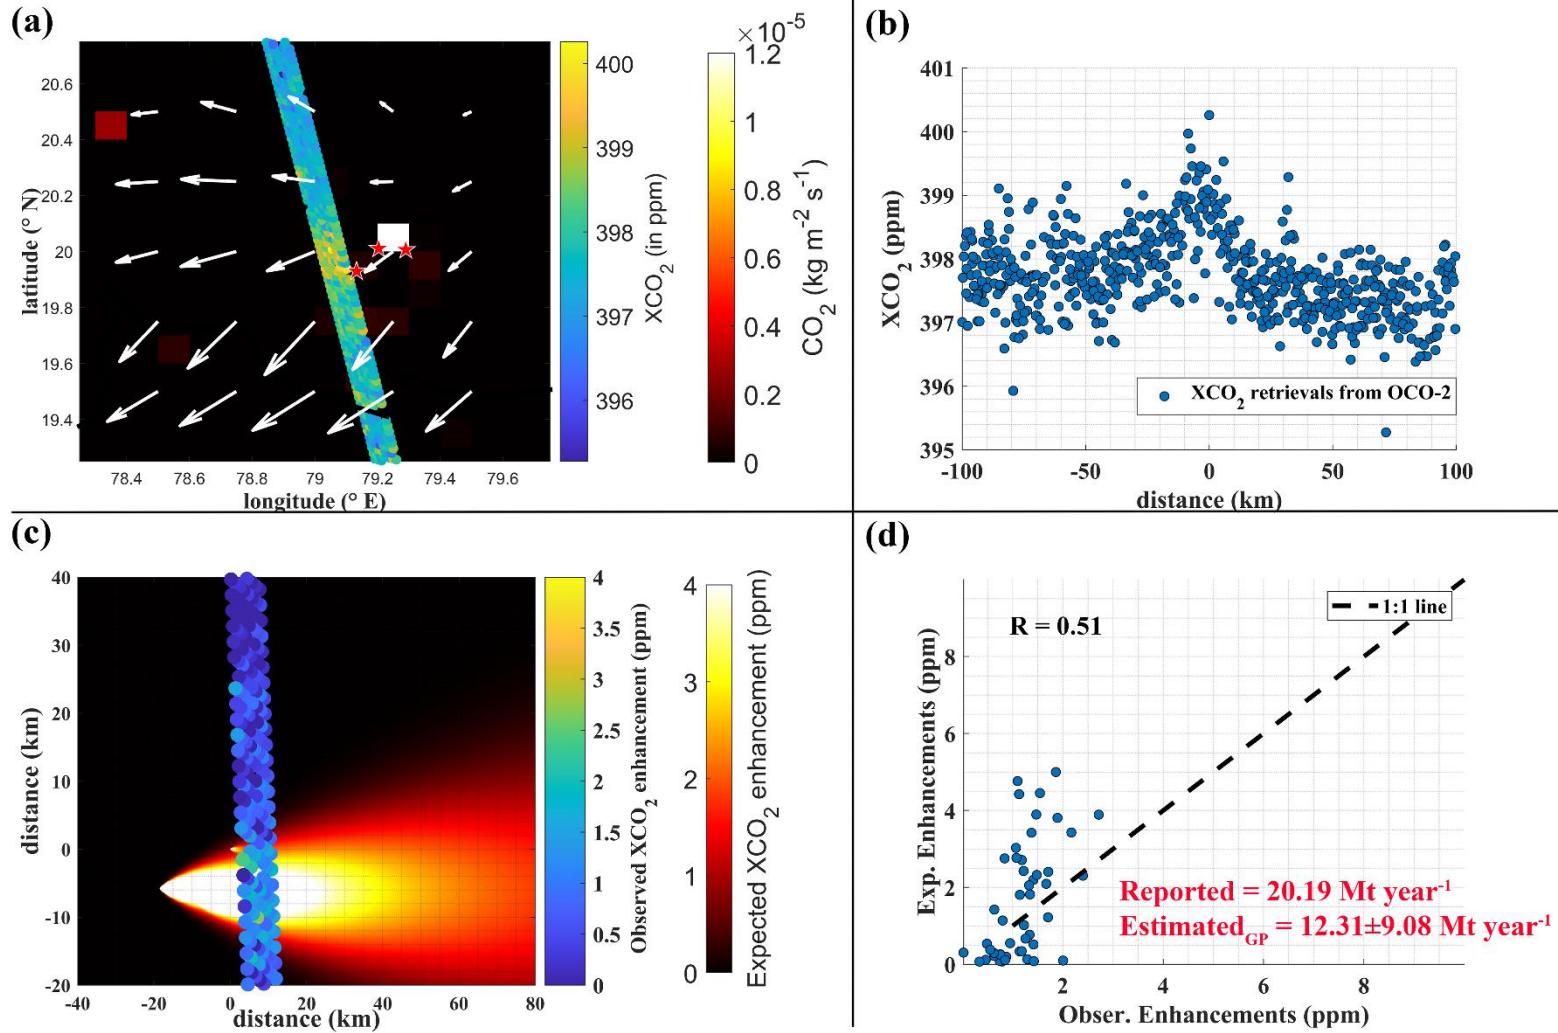



### Cluster-3 on “22 December 2016”

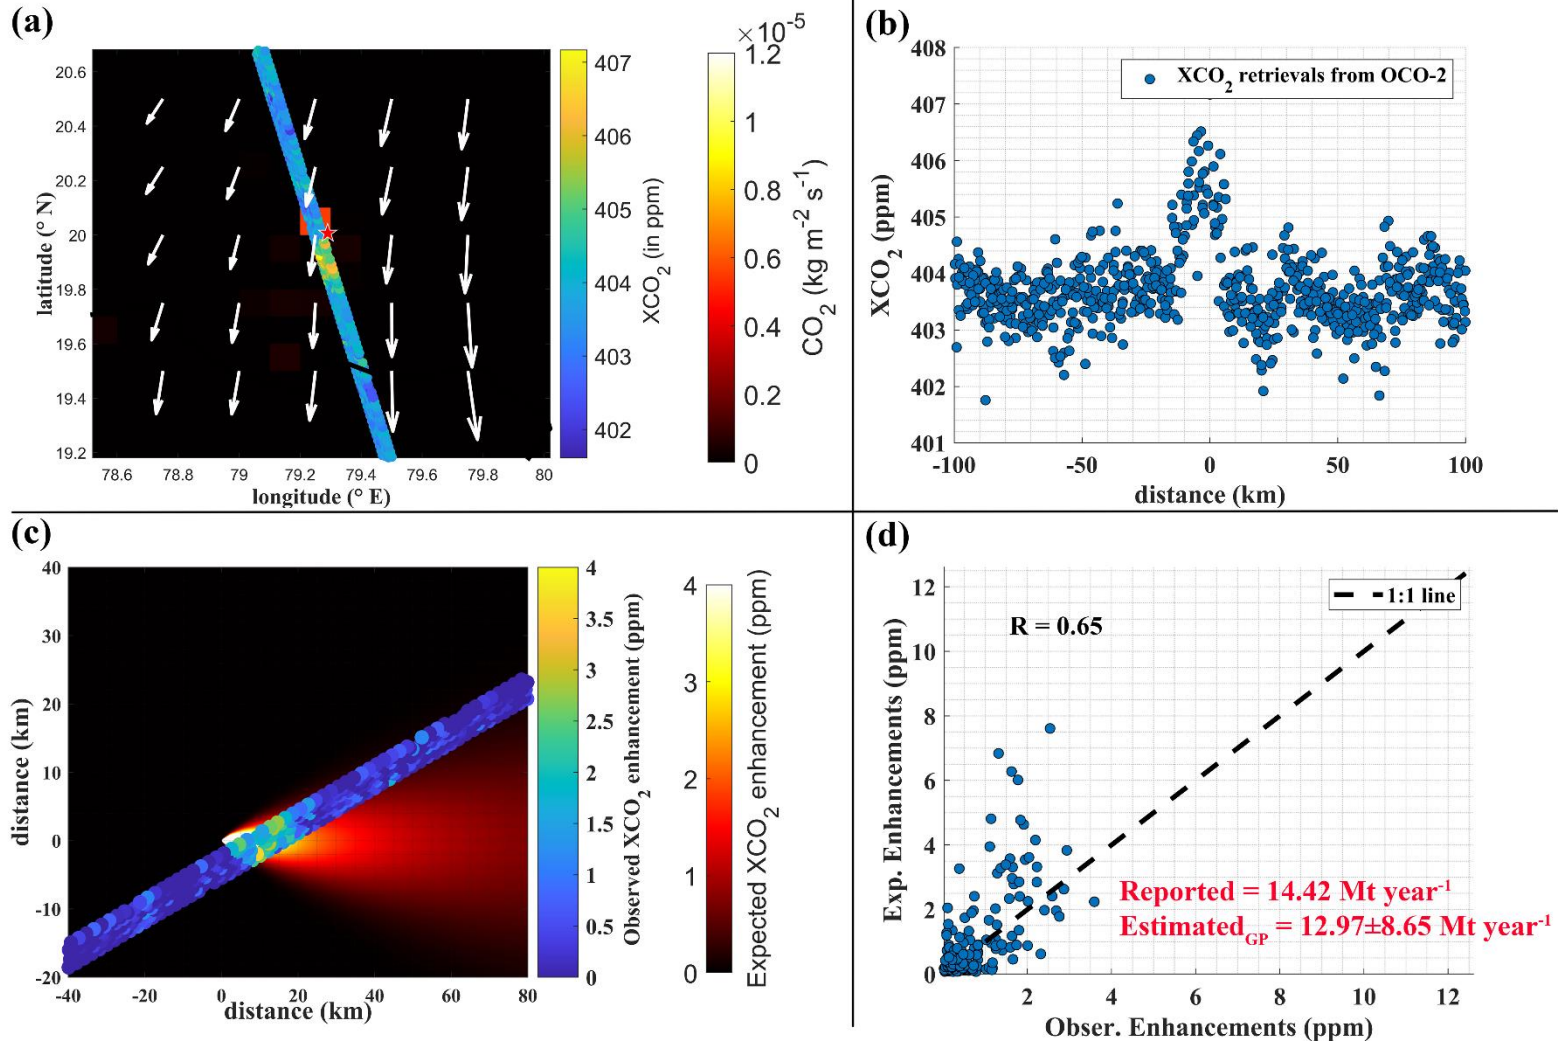

## Cluster-4 on “25 January 2017”

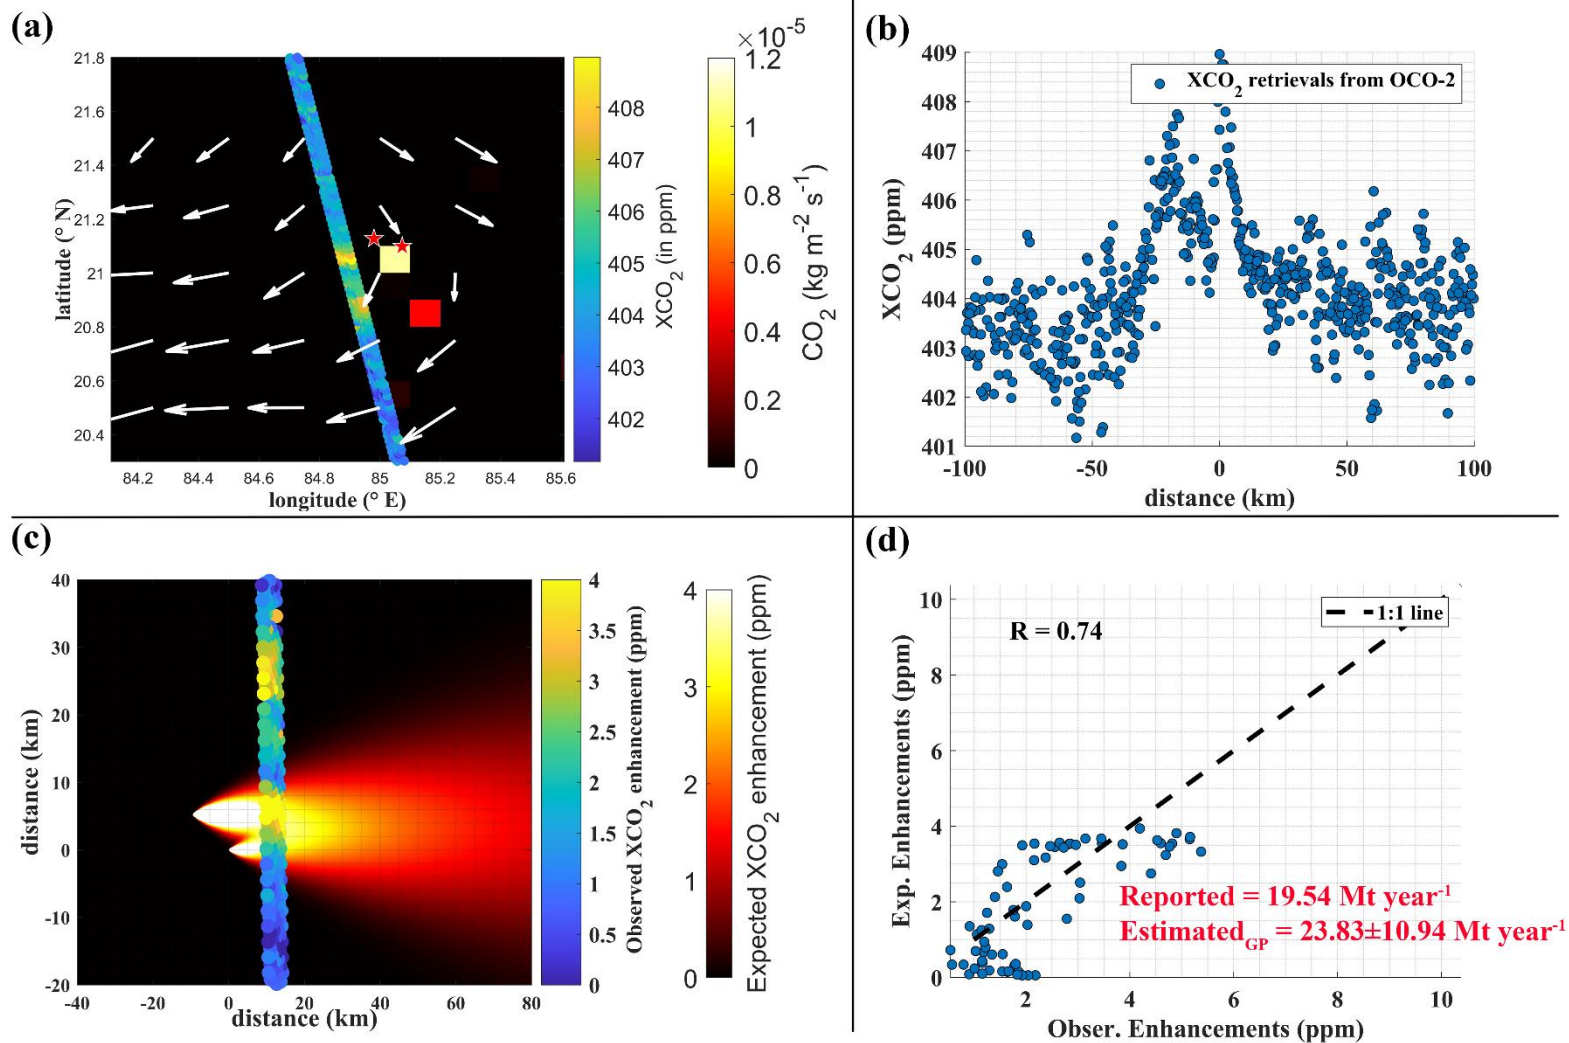

## Cluster-4 on “15 November 2019”

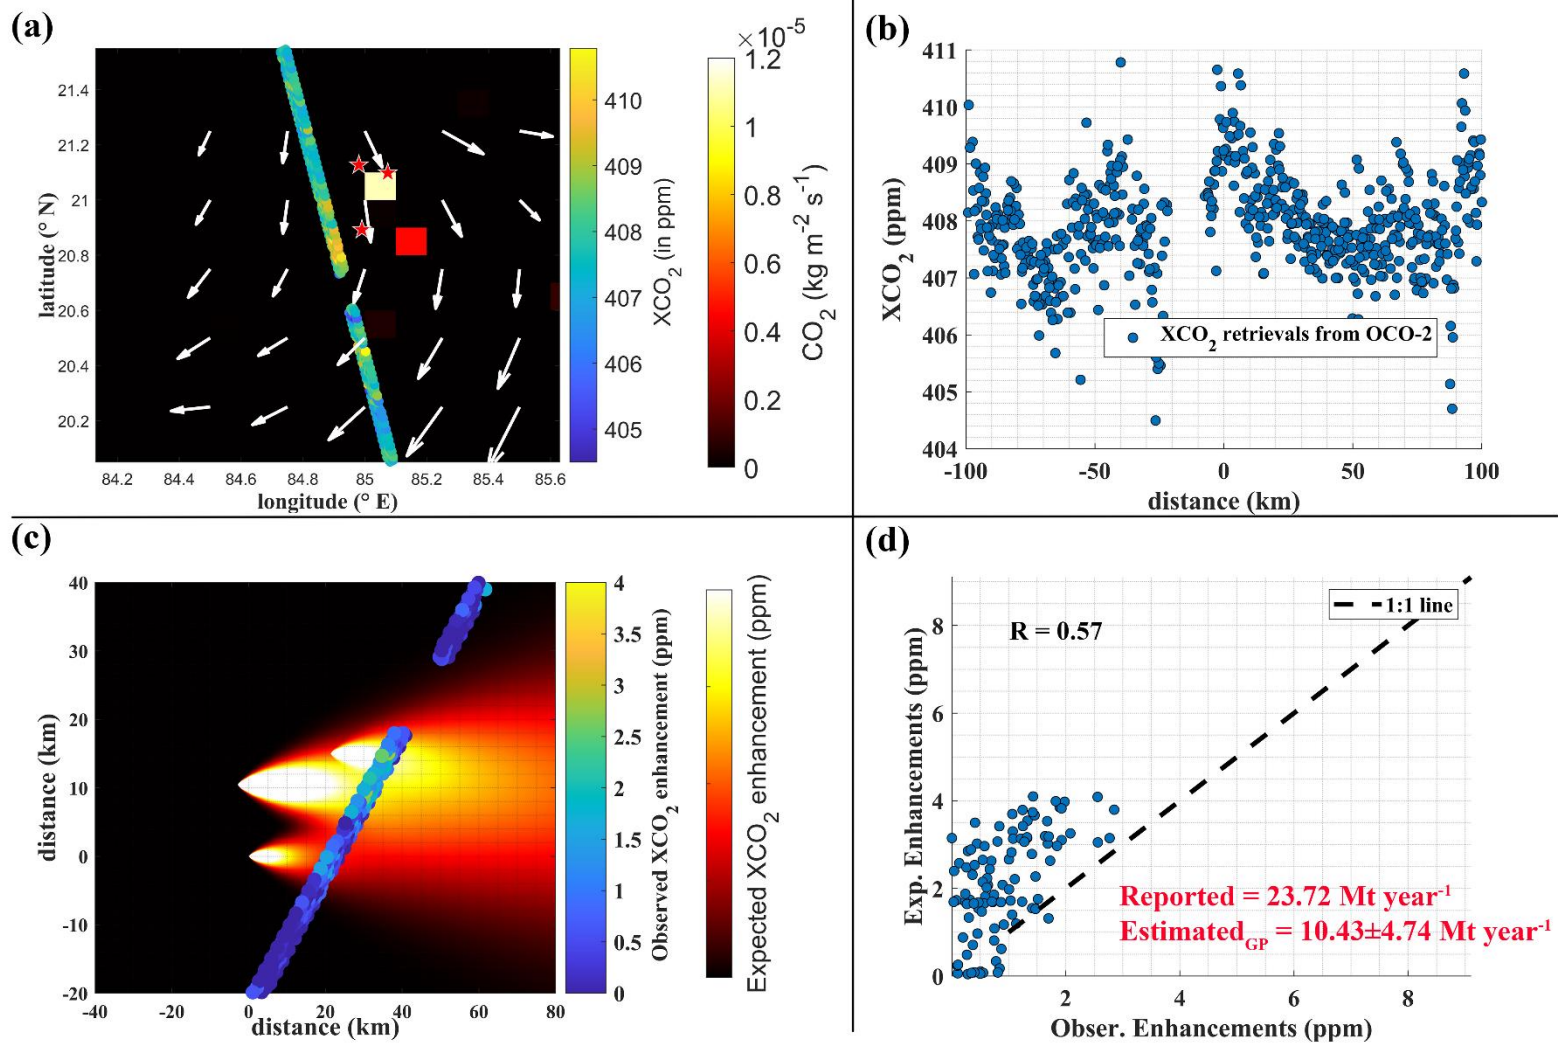



# Sipat Power Station on "1 March 2018"

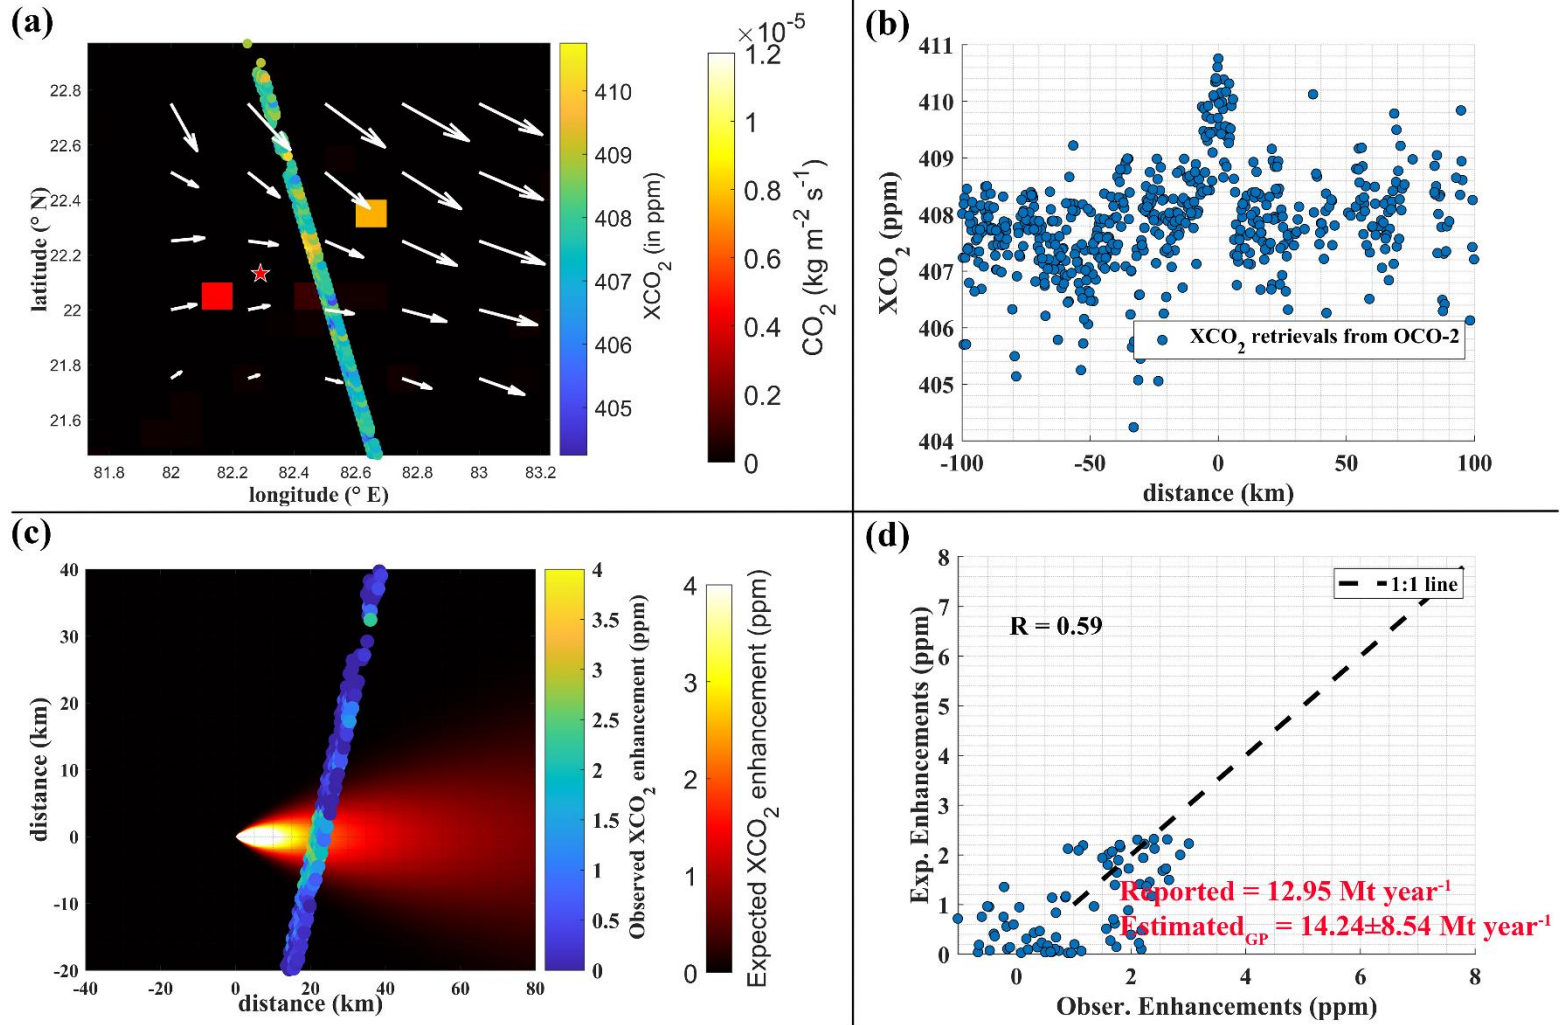

## Cluster-6 on “13 January 2021”

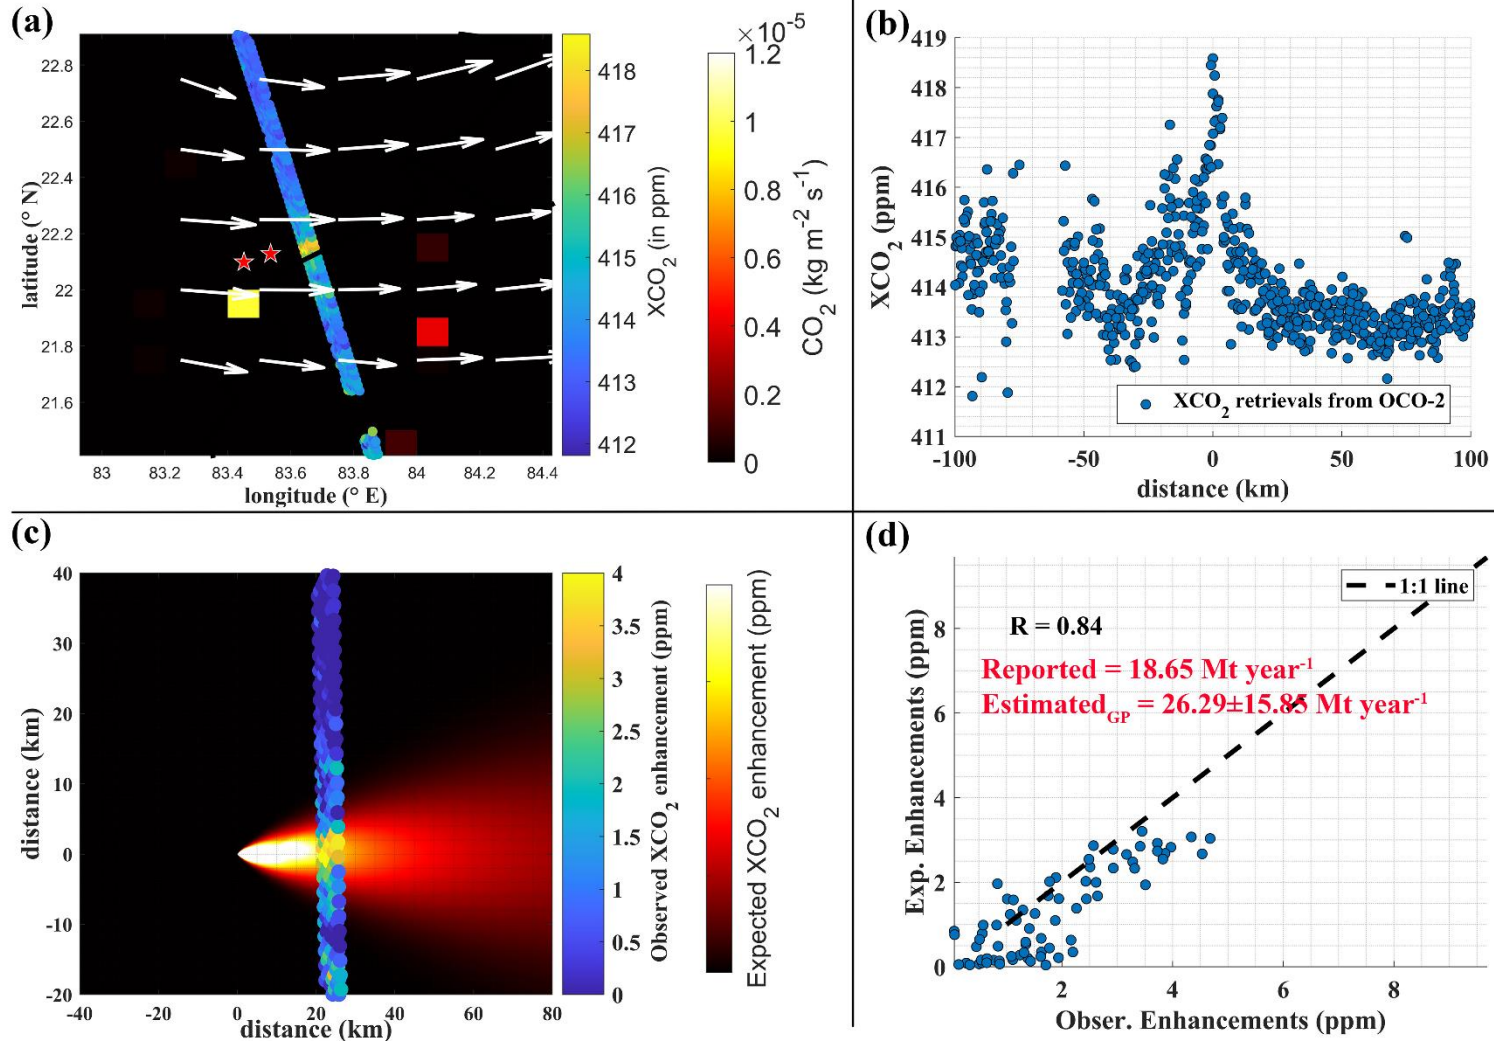



## Cluster-7 on “10 January 2018”

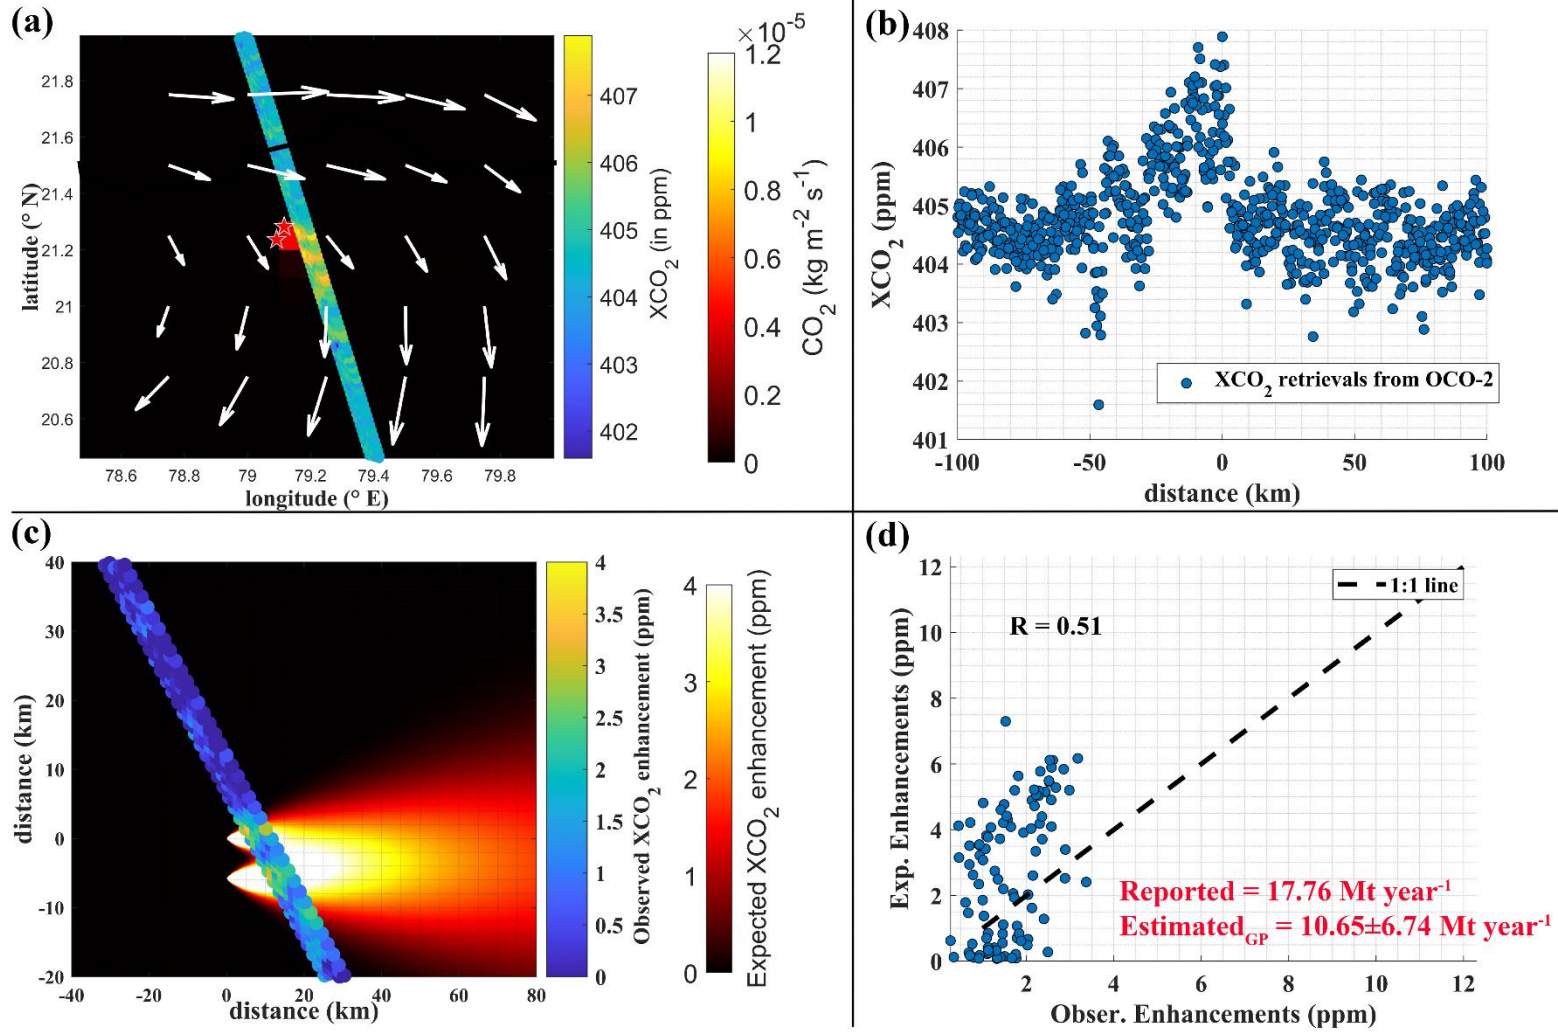

## Cluster-8 on “19 November 2014”

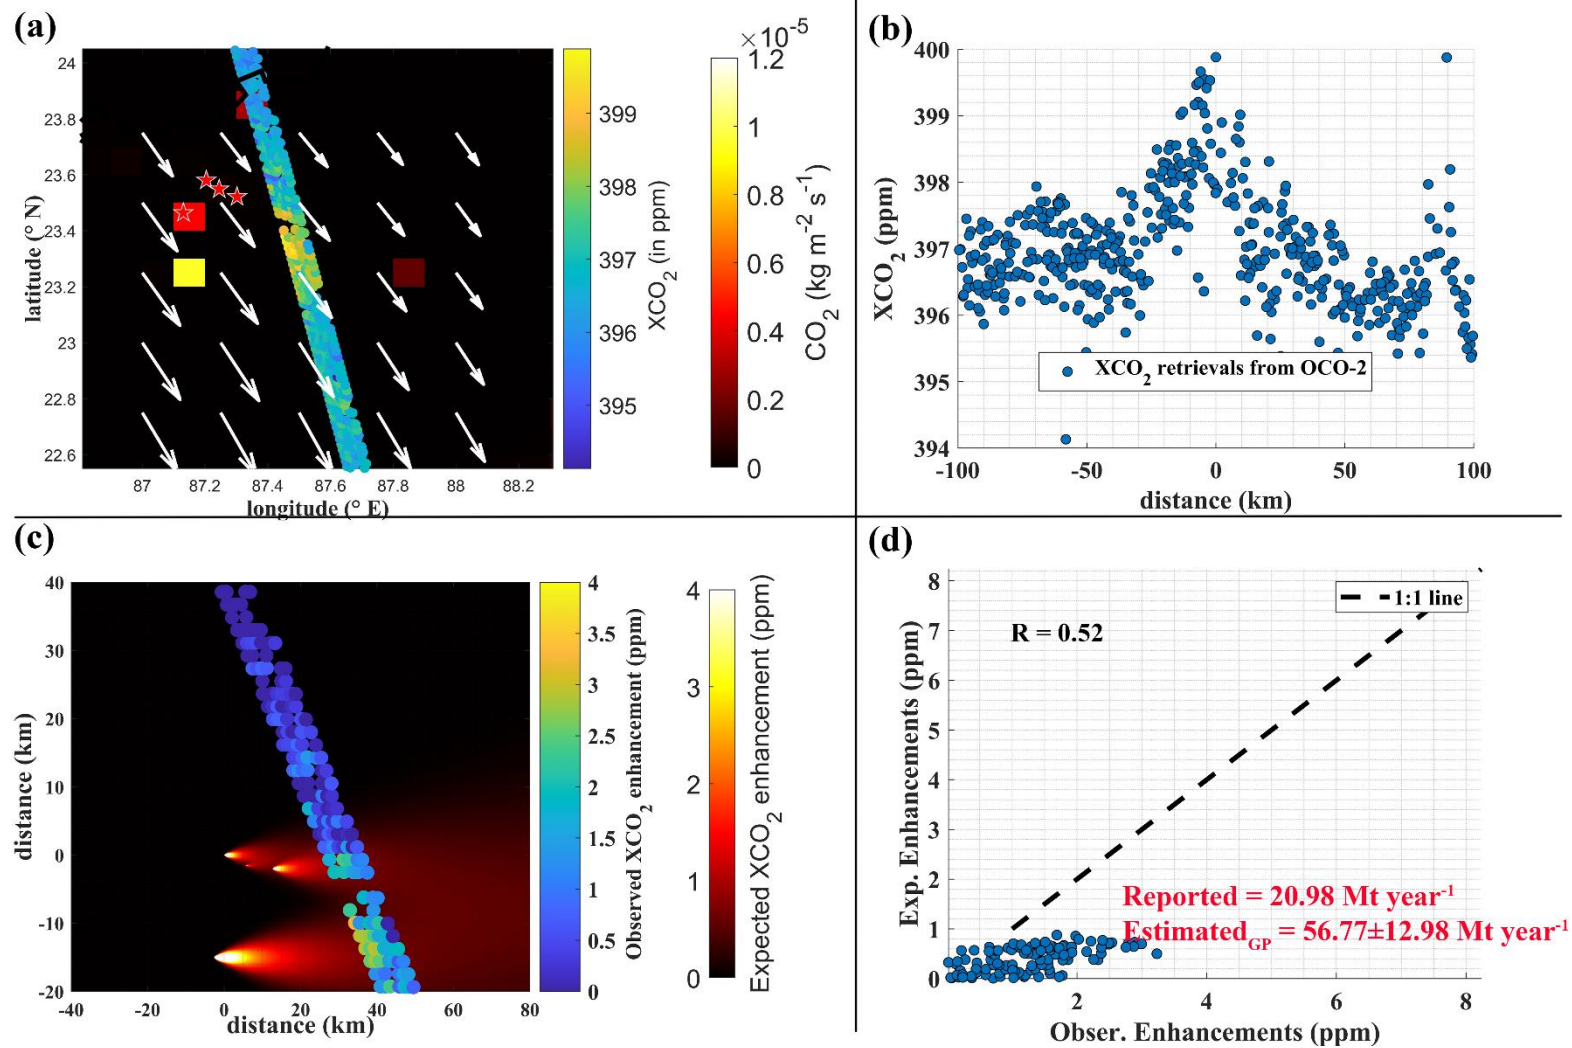

## Cluster-8 on “16 March 2017”

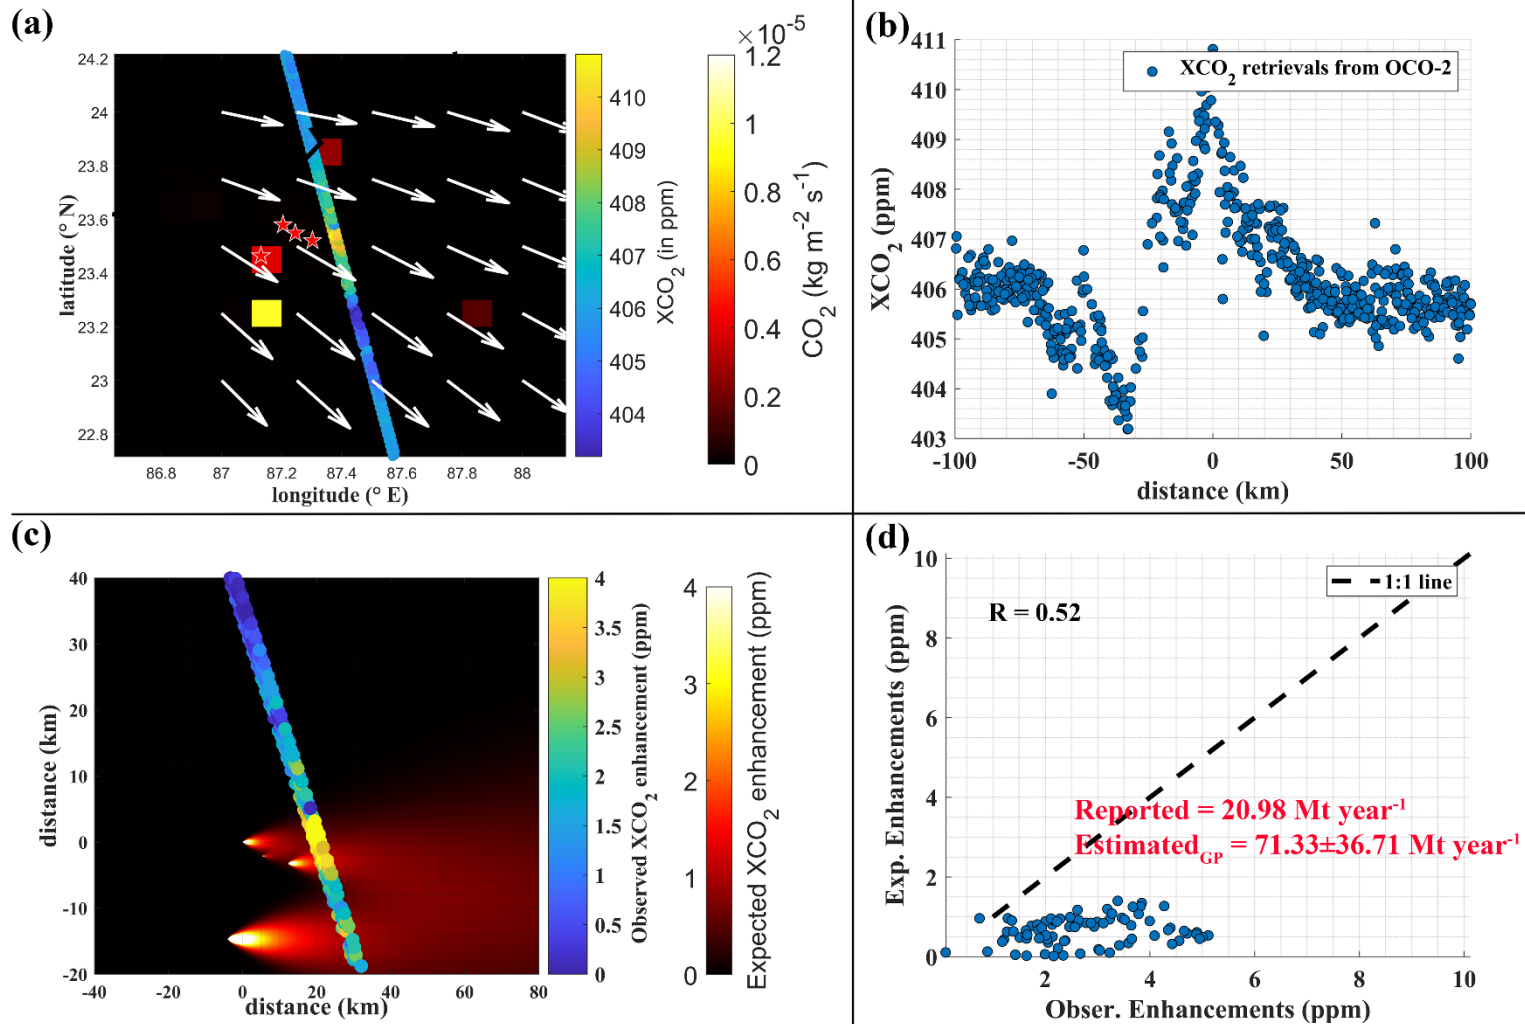

## Cluster-8 on “29 December 2017”

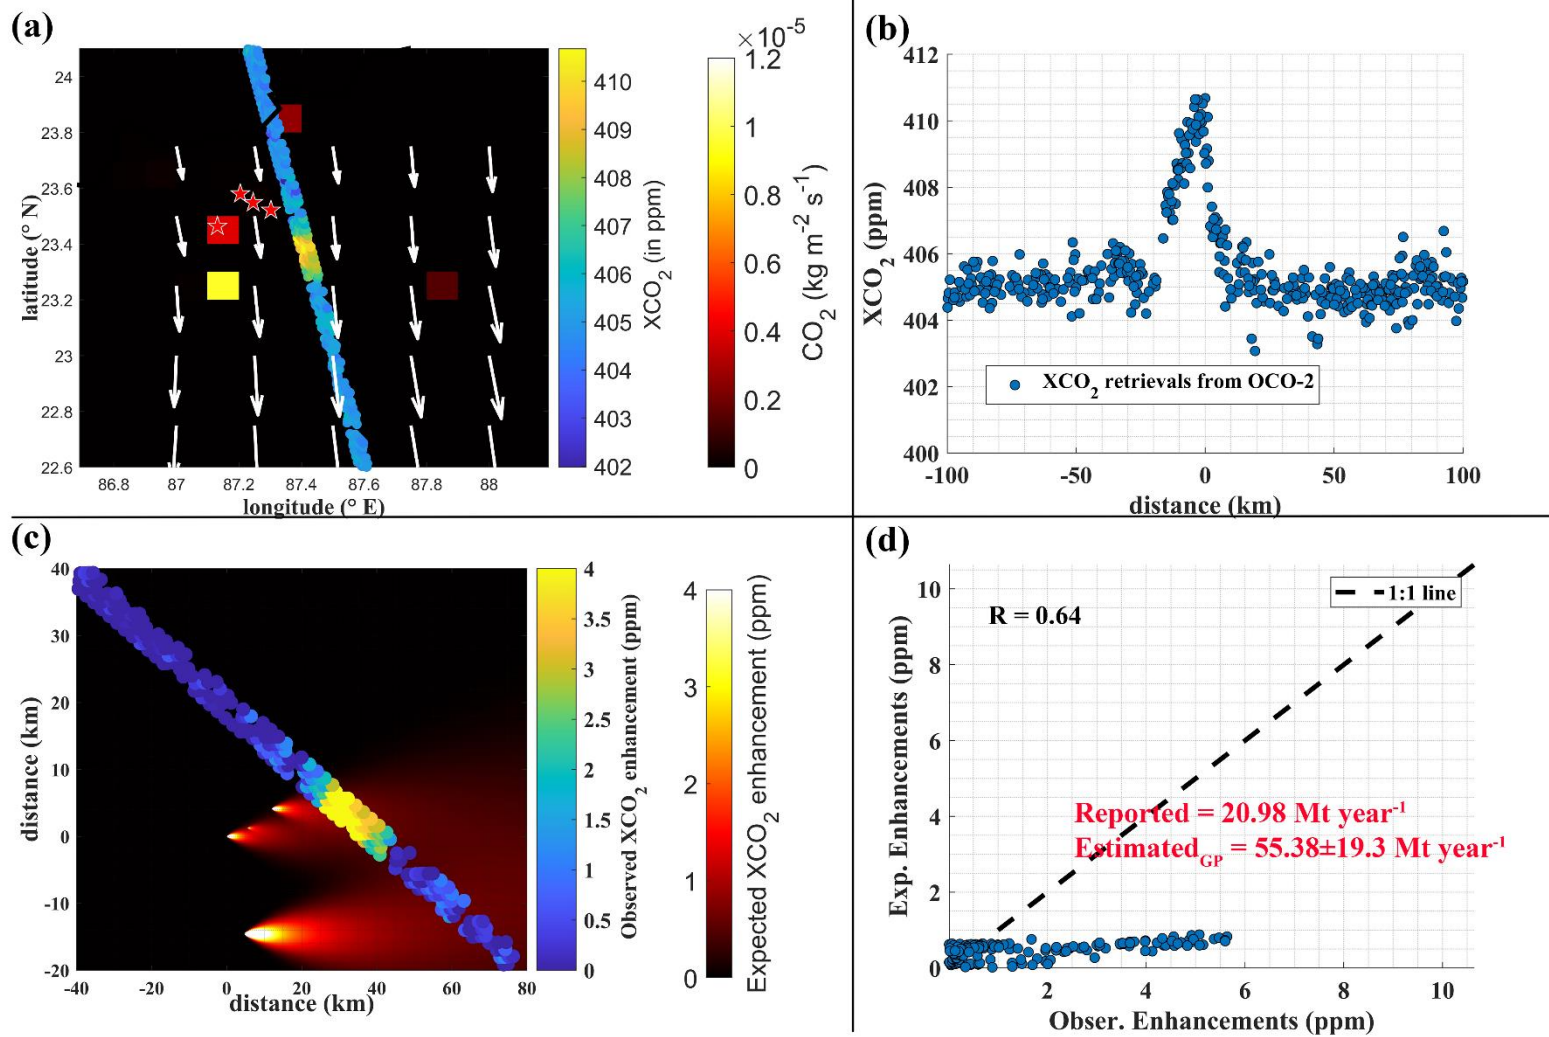



## Cluster-9 on “18 January 2017”

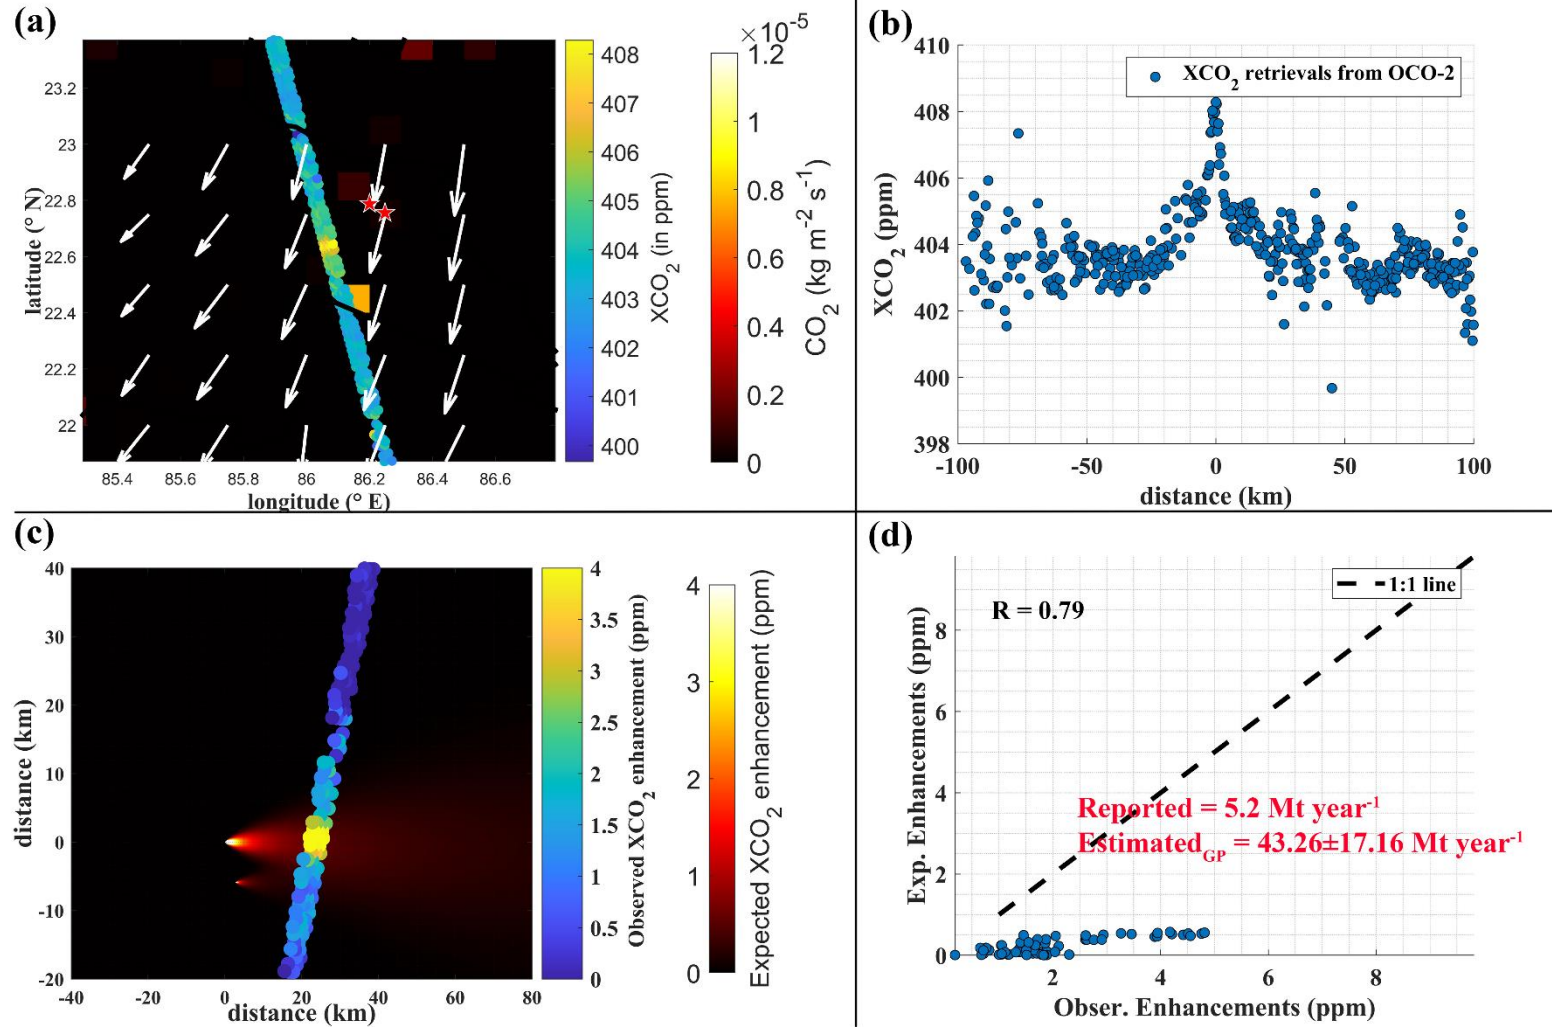

## Cluster-9 on “28 November 2020”

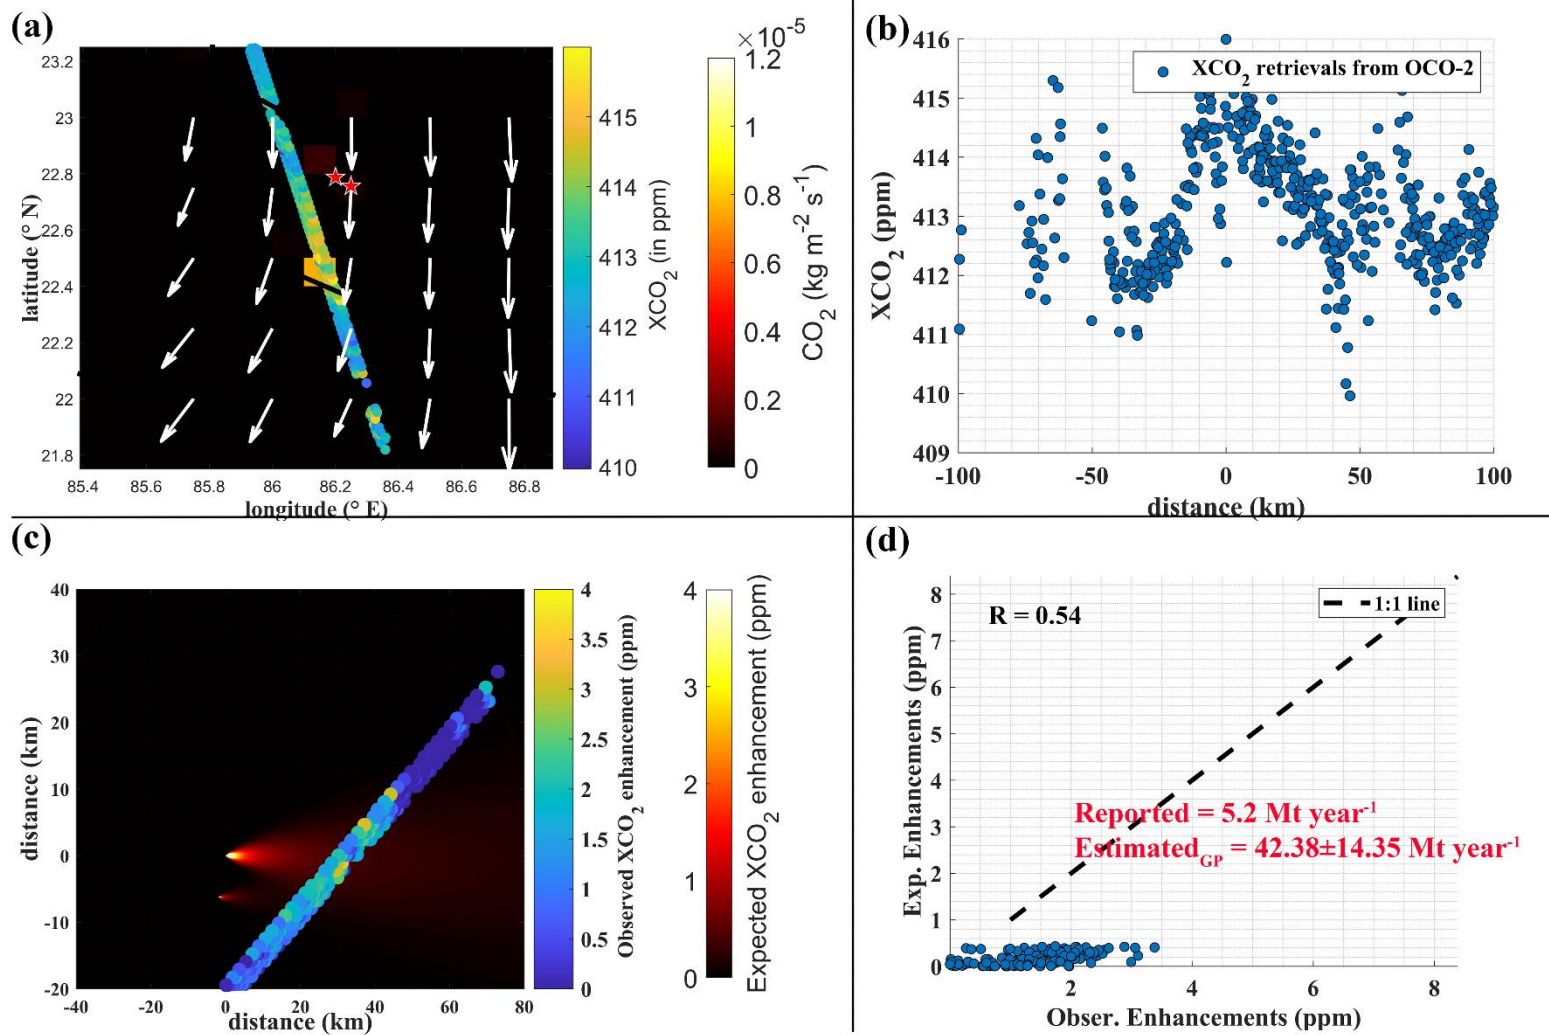

## Cluster-9 on “31 October 2022”

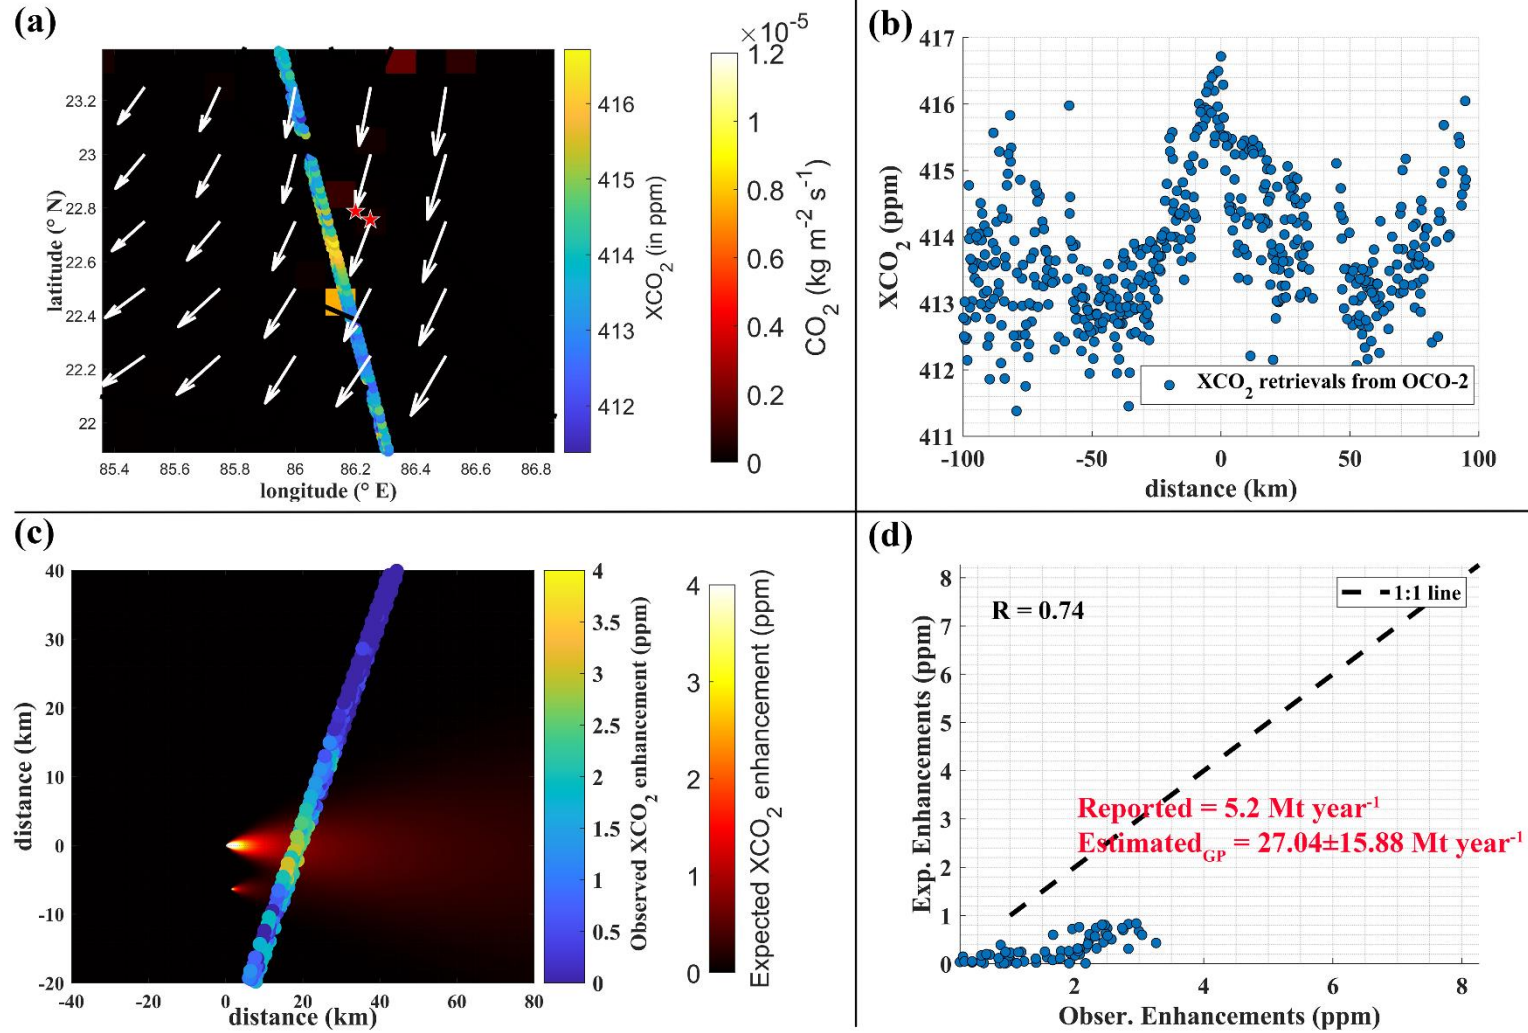

## Cluster-9 on “7 January 2018”

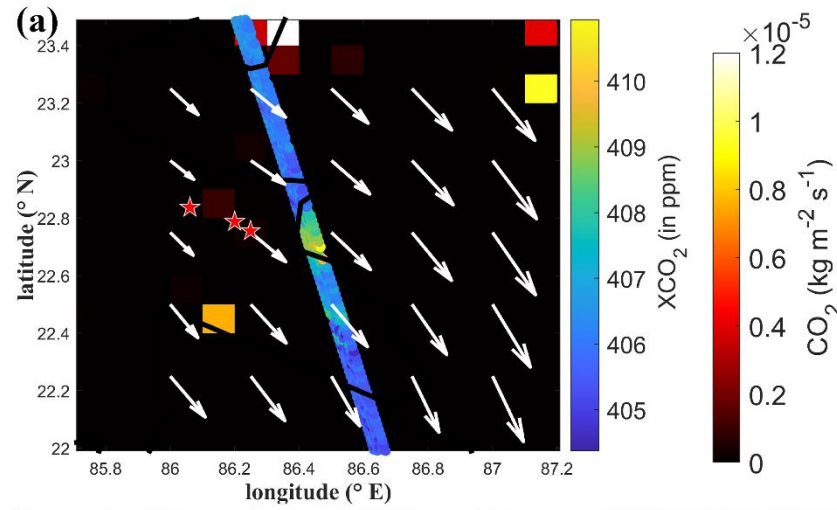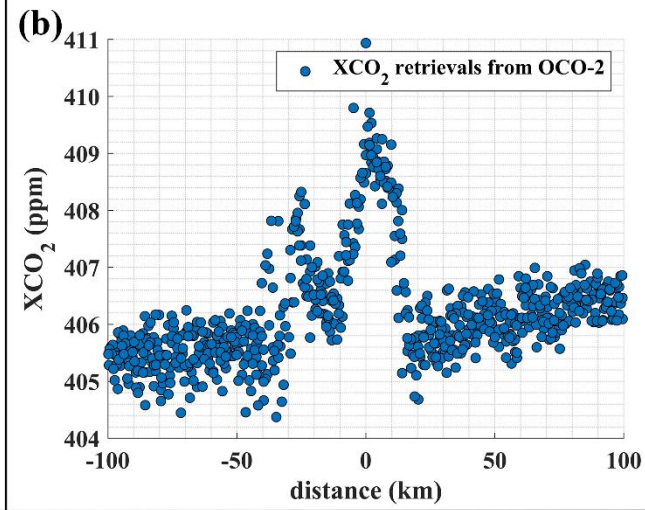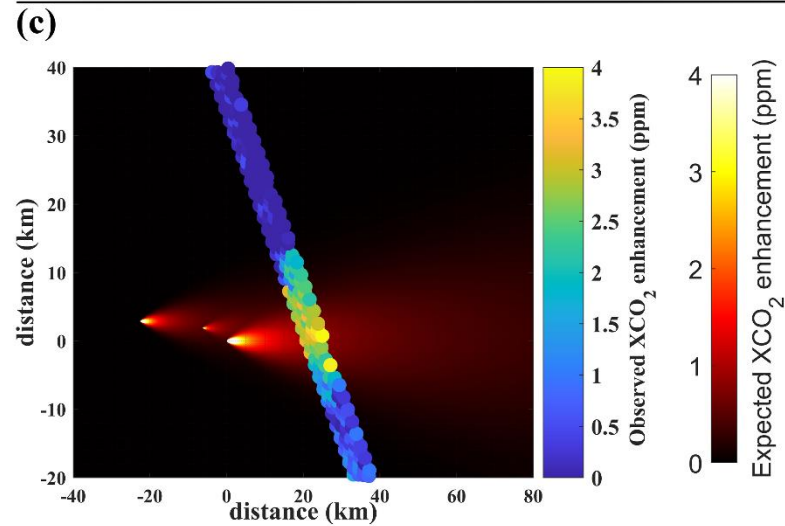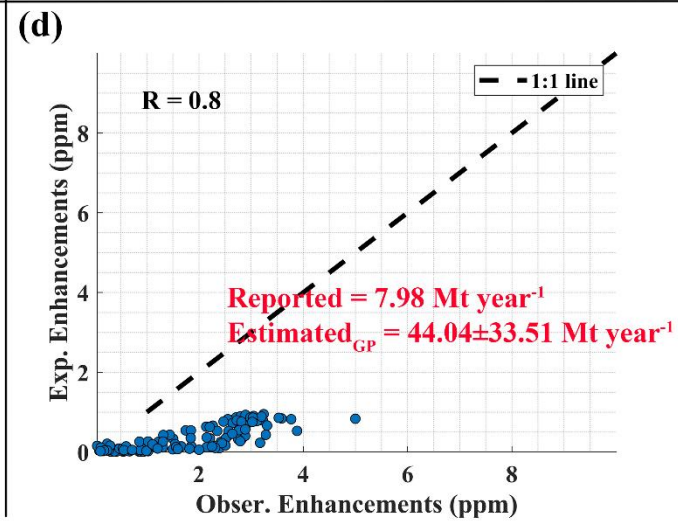



# Cluster-10 on “30 December 2014”

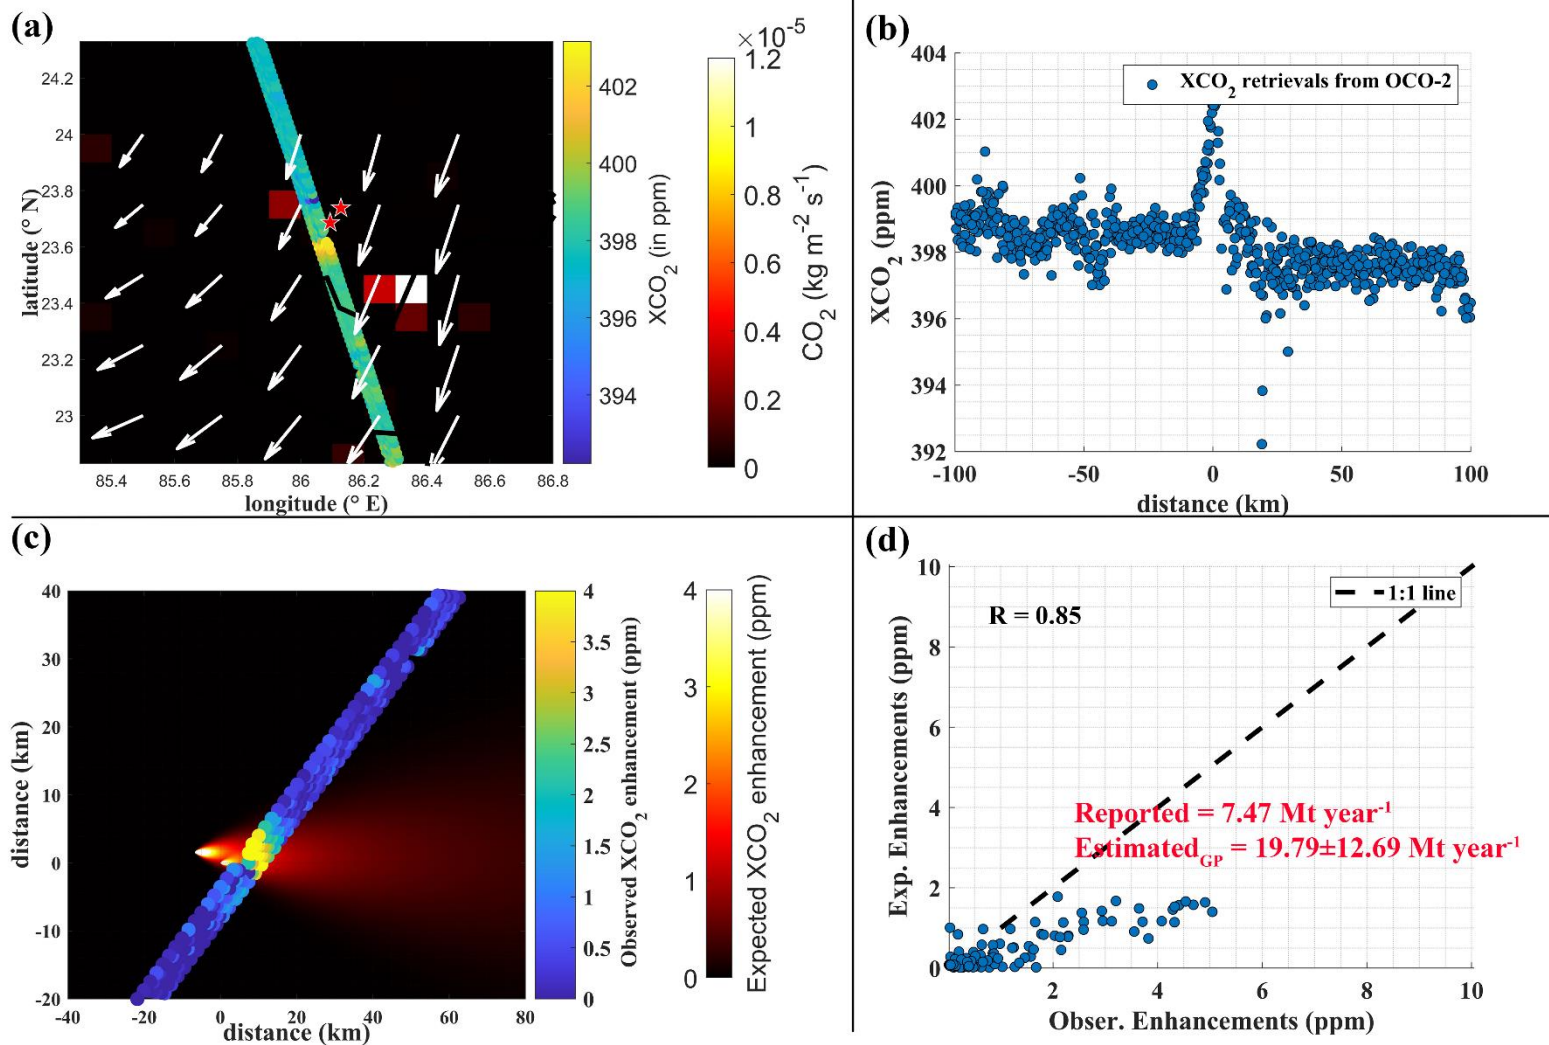

## Cluster-10 on “31 January 2015”

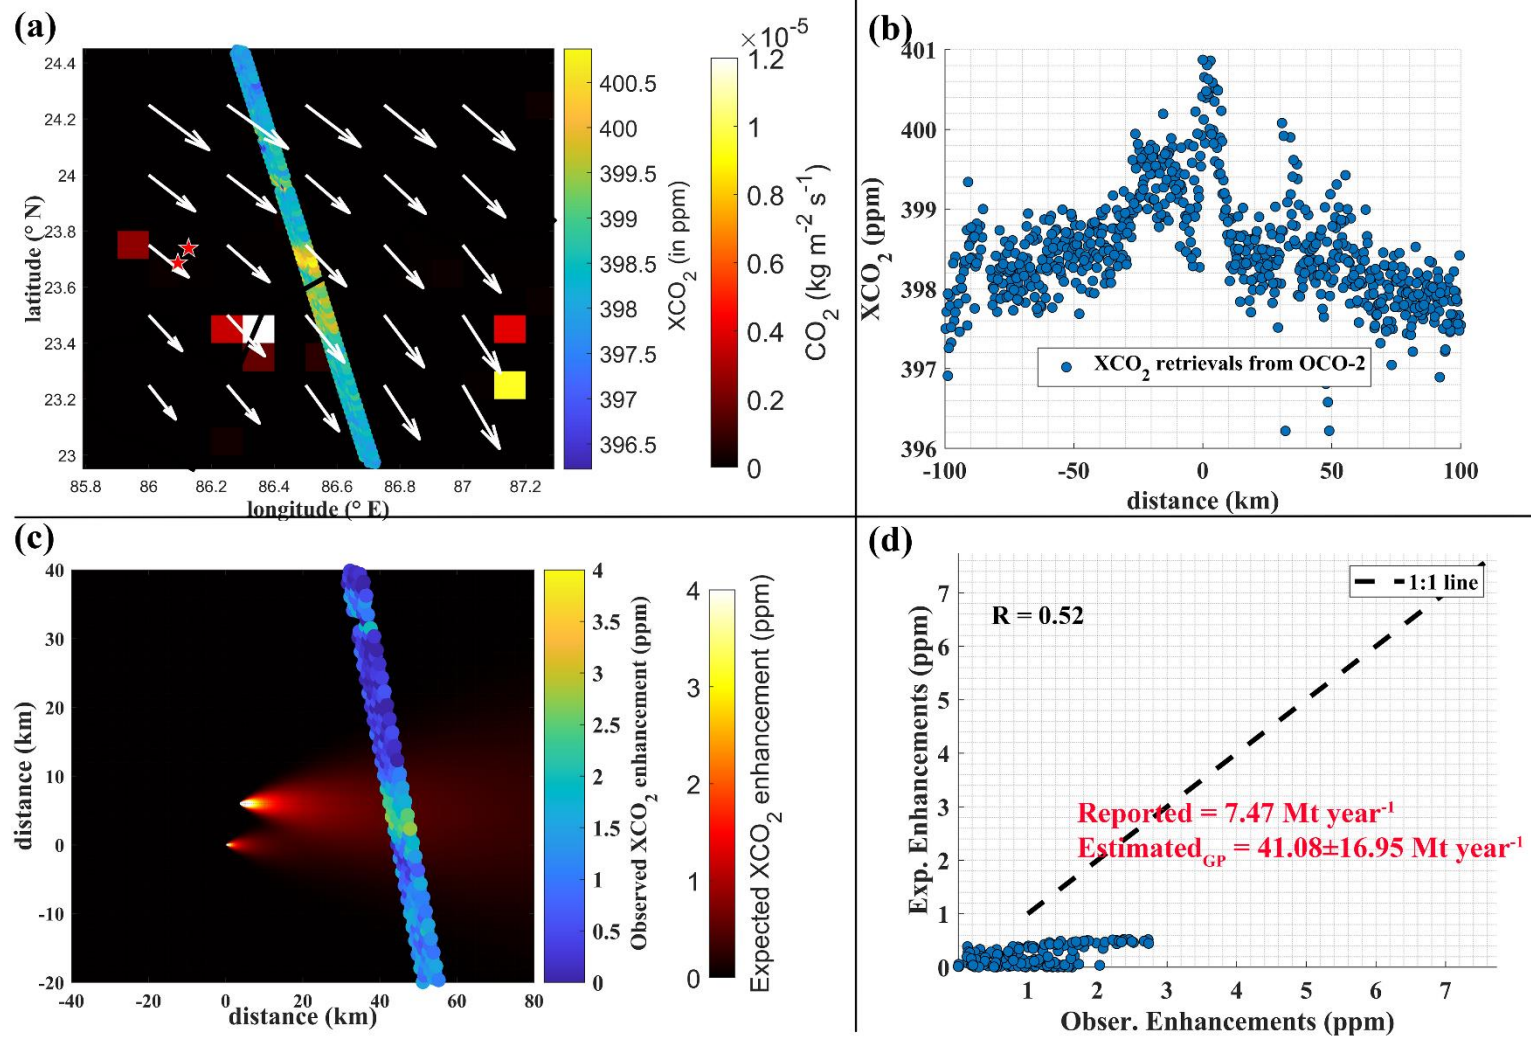

## Cluster-10 on “18 January 2020”

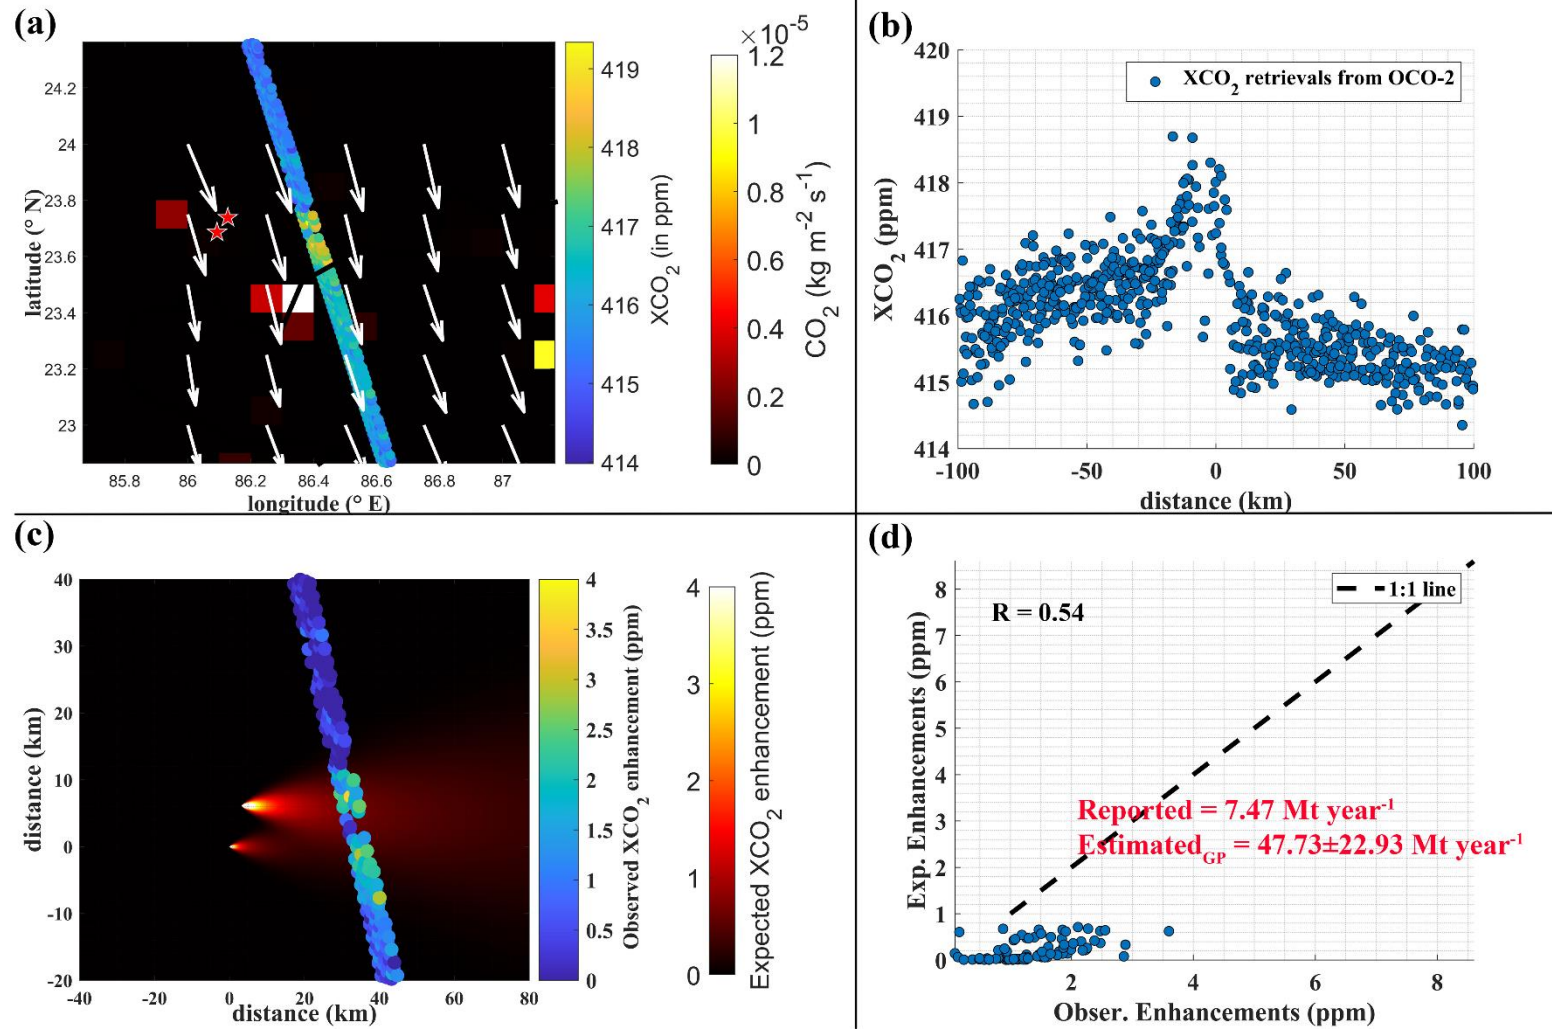



## Cluster-10 on “31 January 2021”

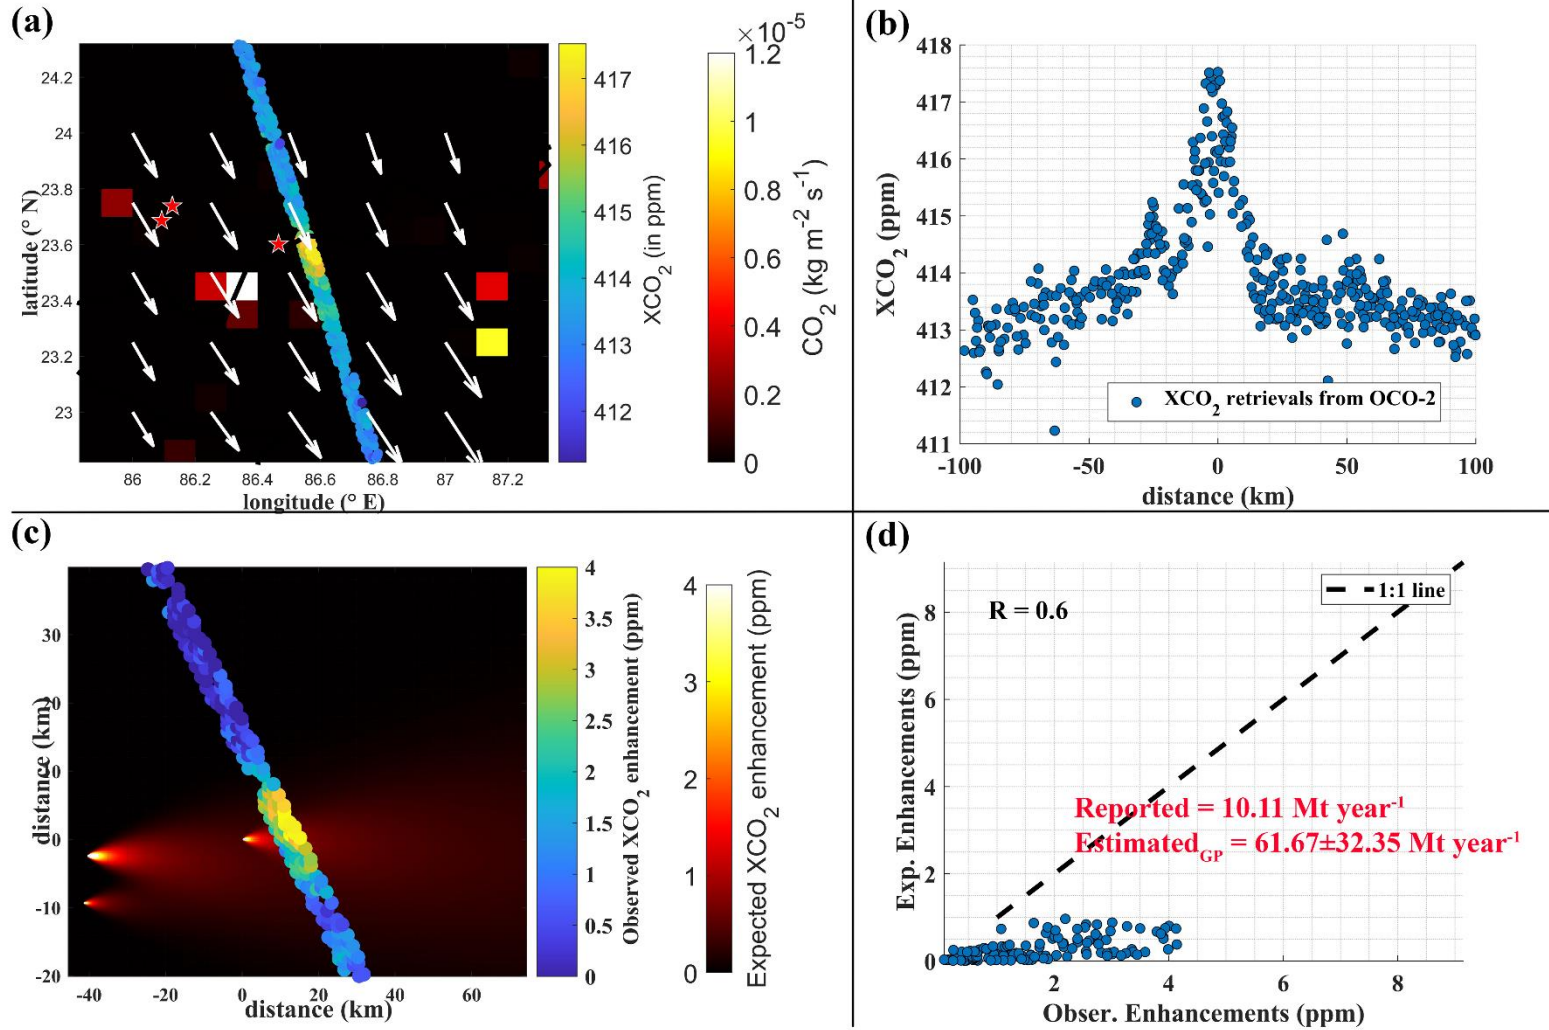

## Bhilai Steel power station on “7 January 2017”

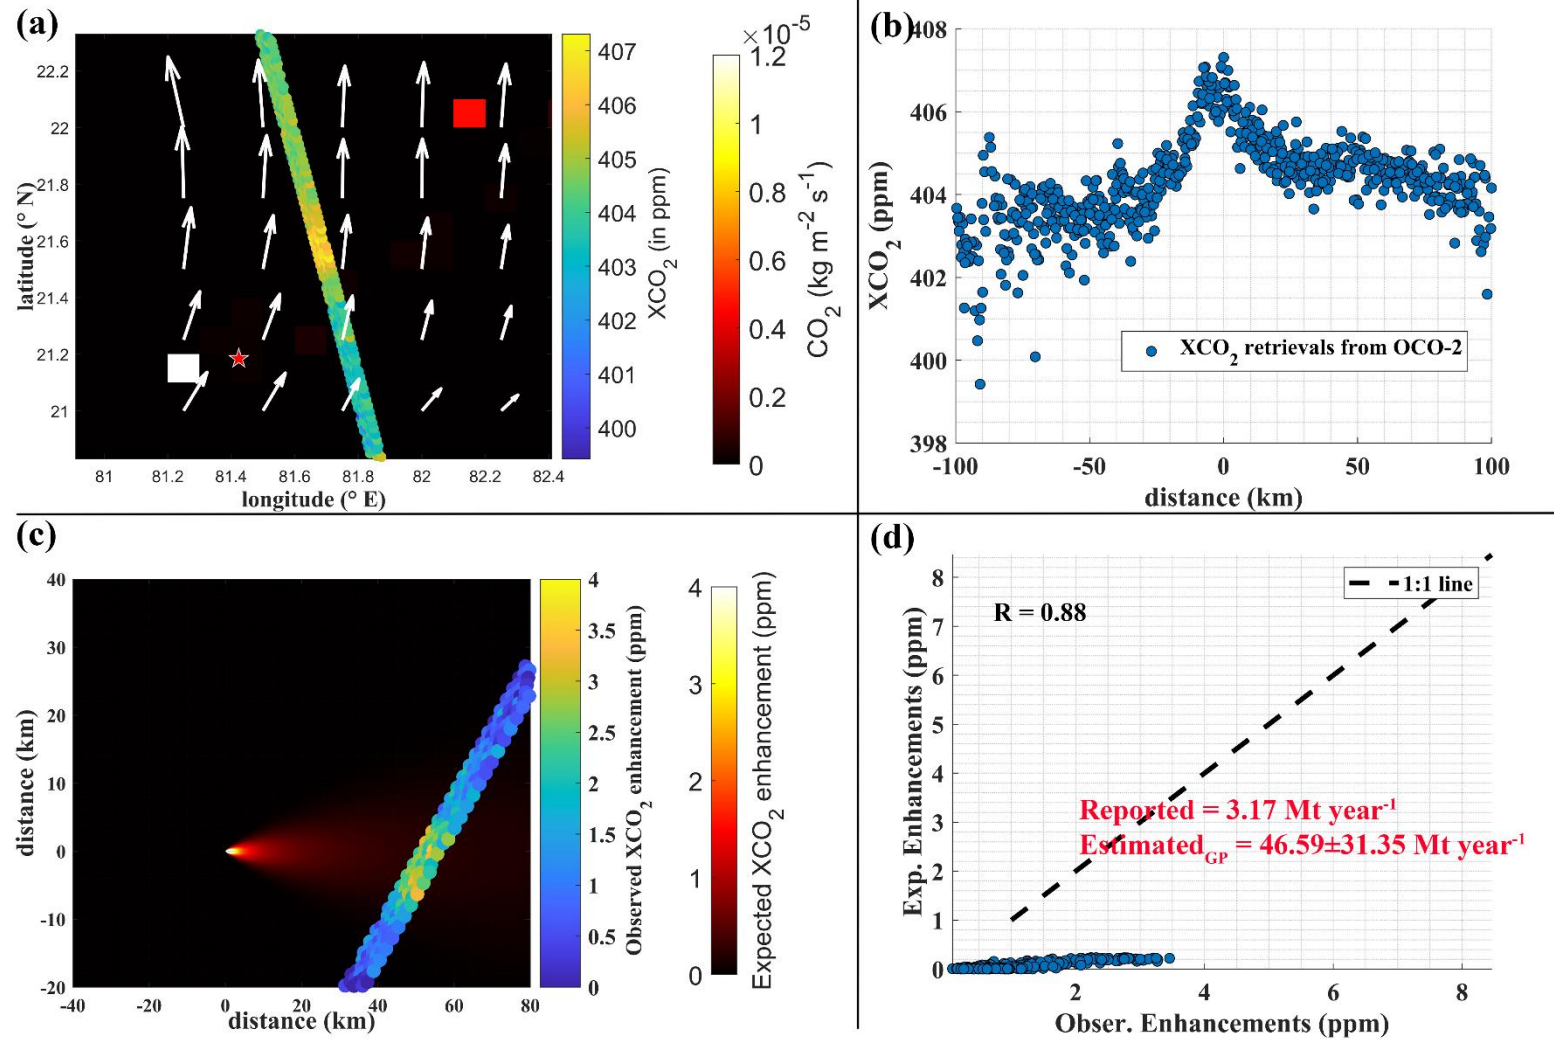

## Bhilai steel power station on “8 February 2017”

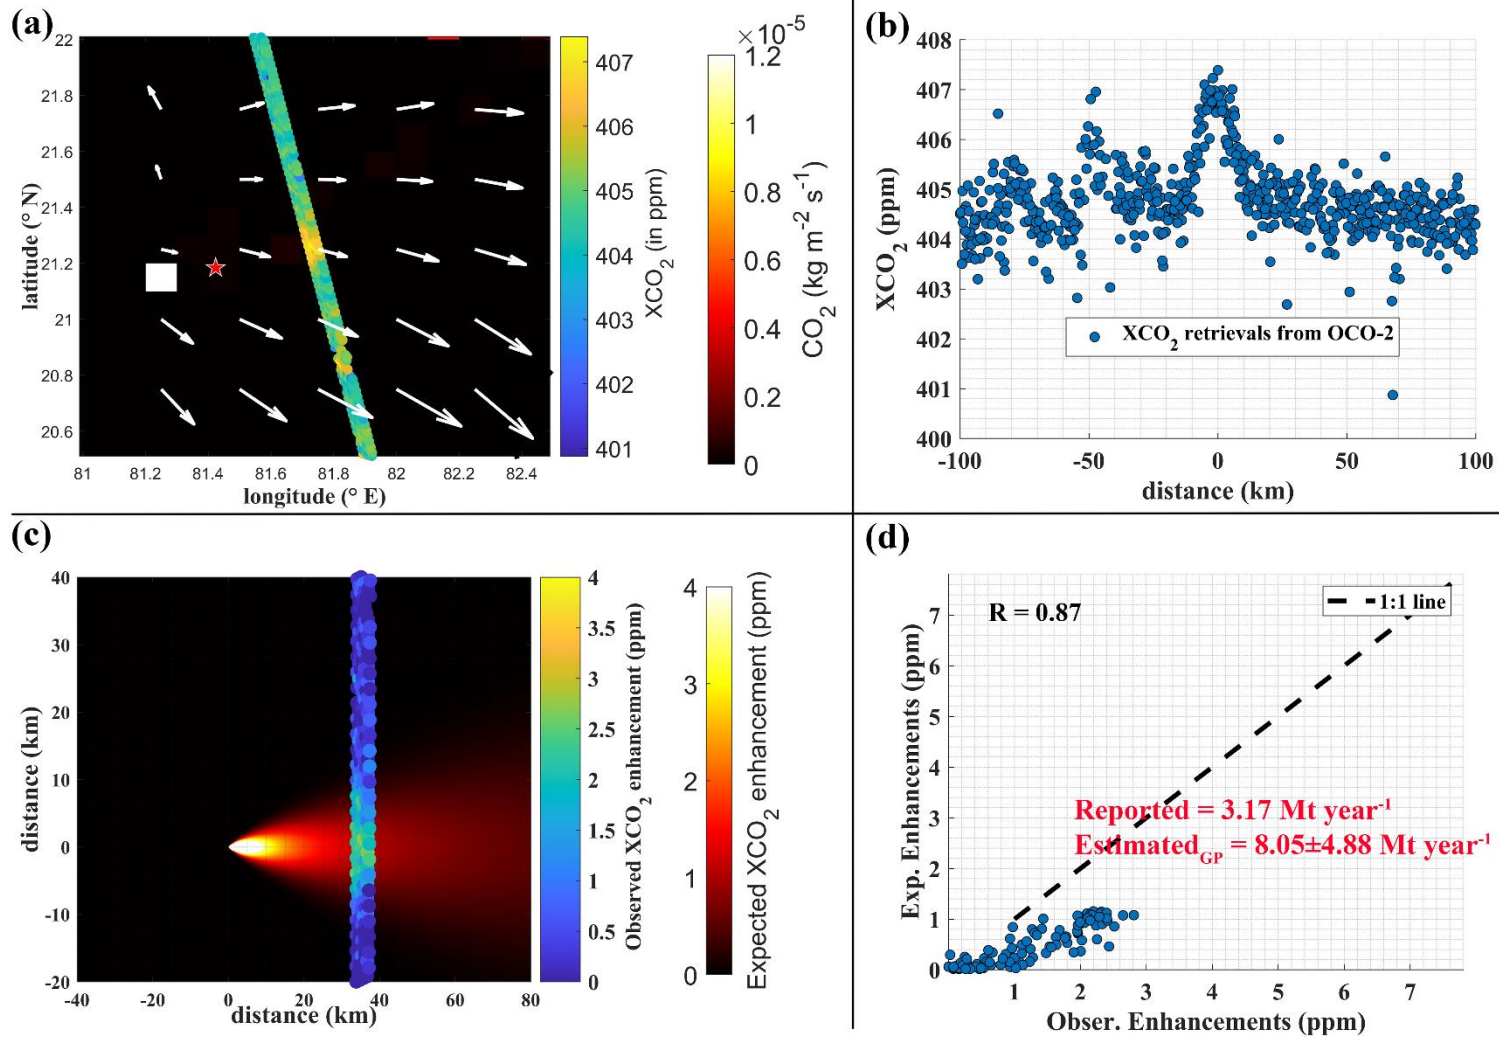



## Bhilai steel power station on “14 February 2019”

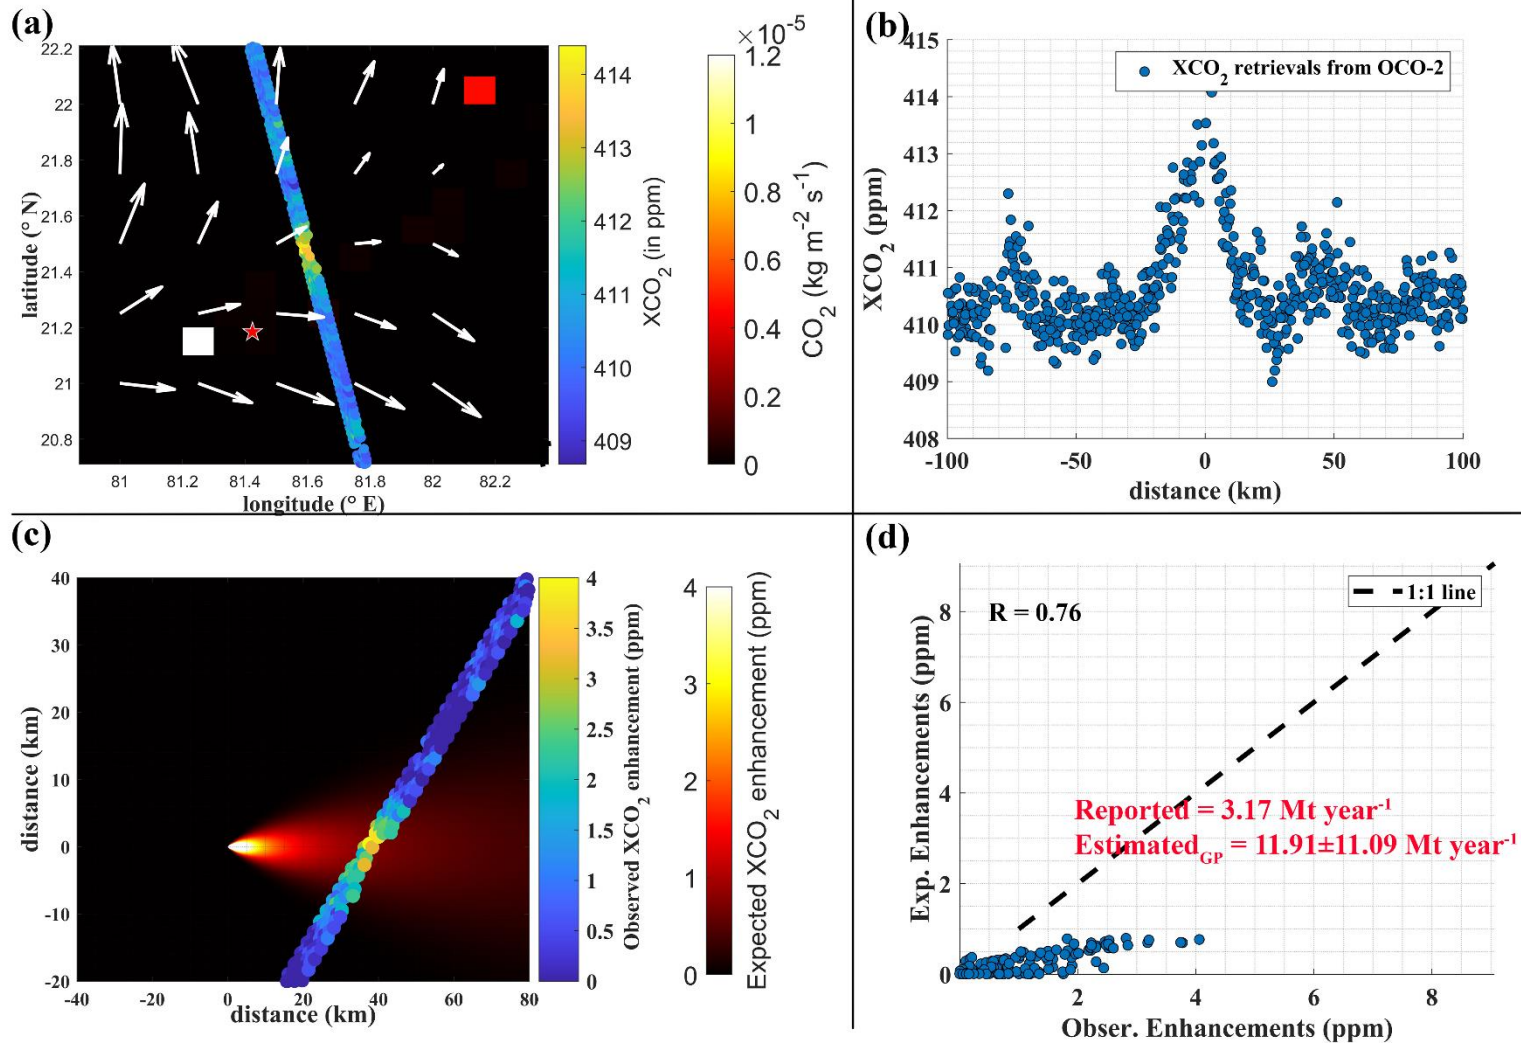

## Bhilai steel power station on “10 February 2020”

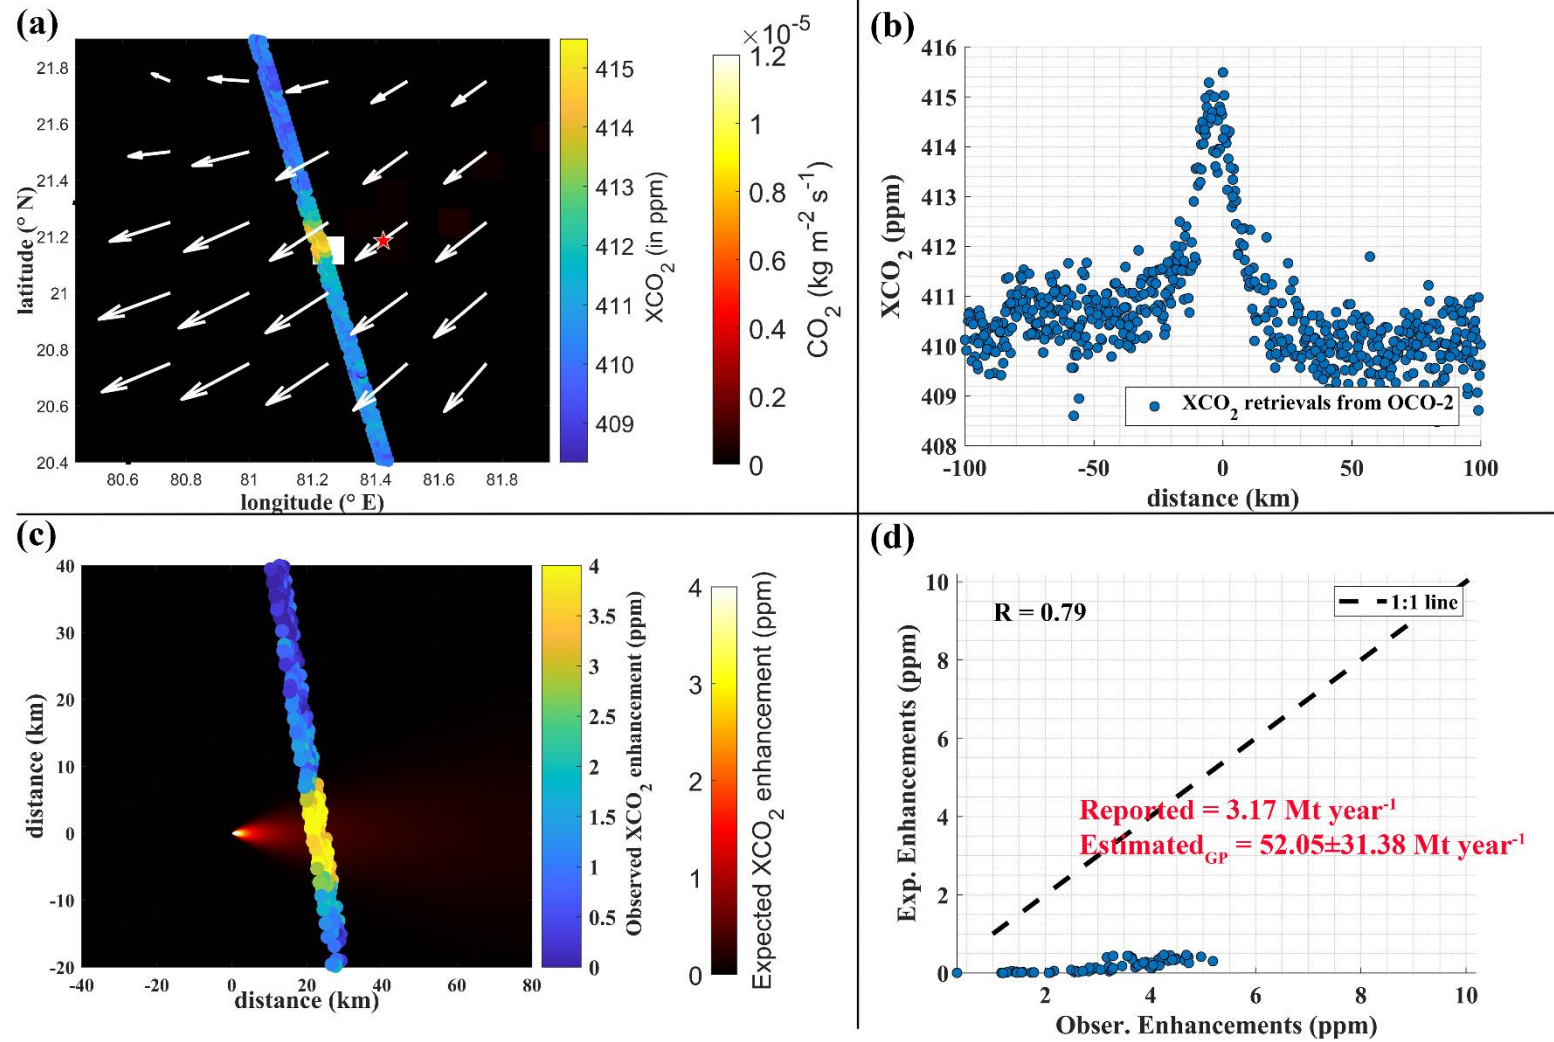



## Cluster 11 on “4 March 2018”

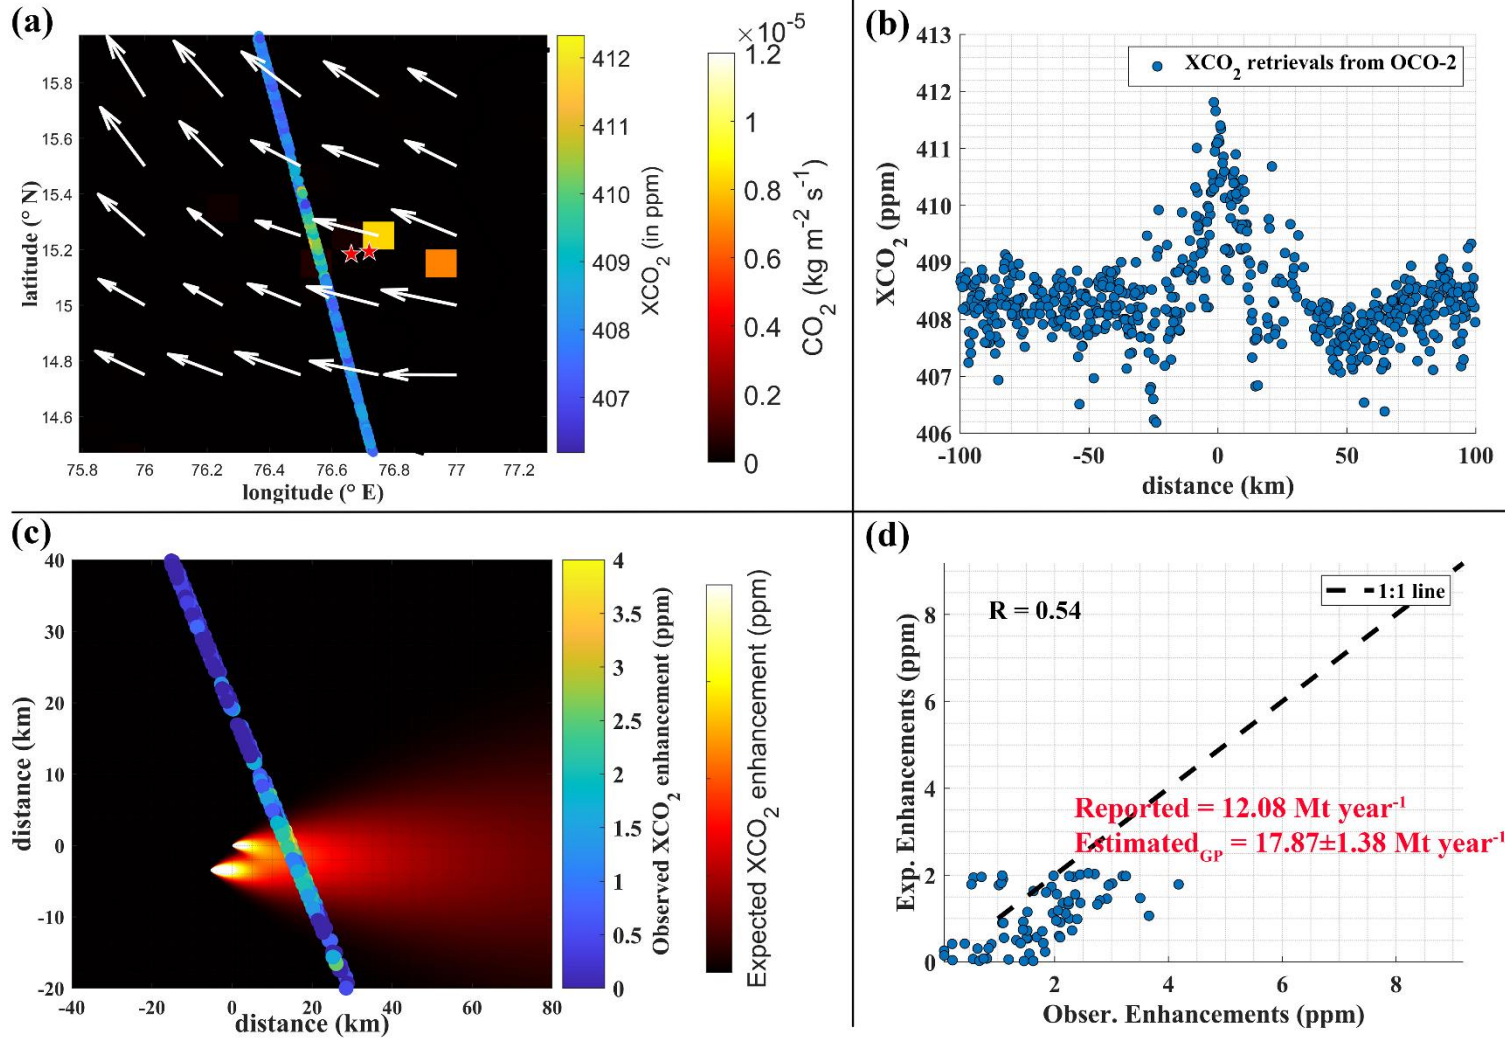

## Cluster 11 on “18 January 2019”

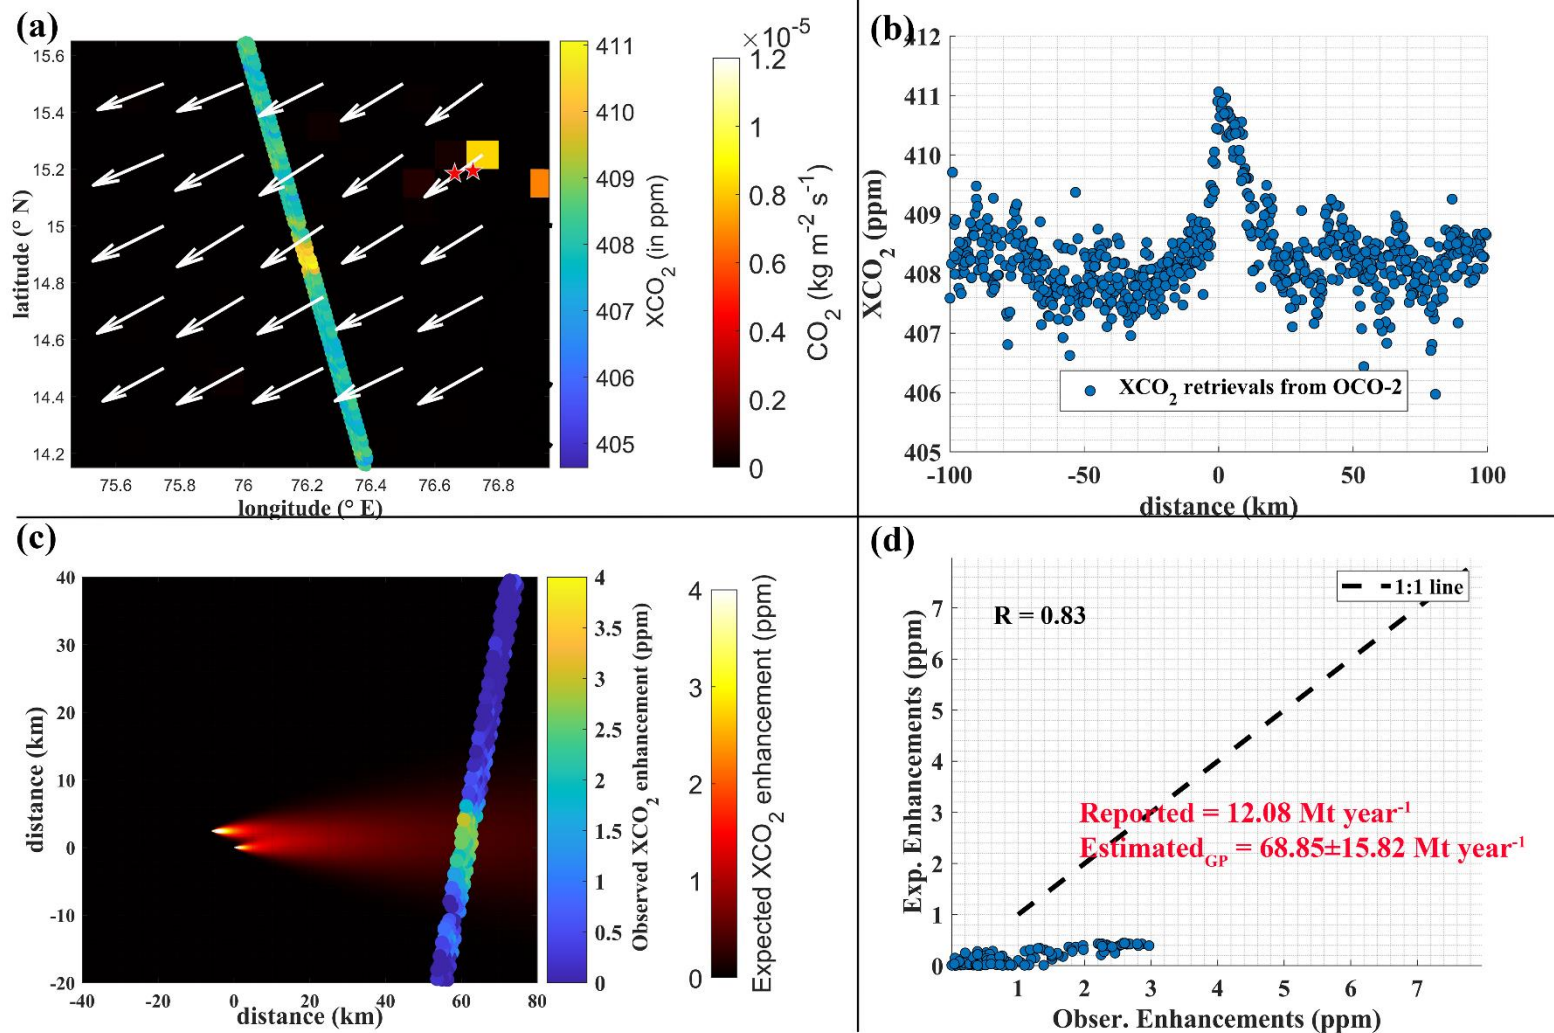

## Cluster 11 on “24 February 2021”

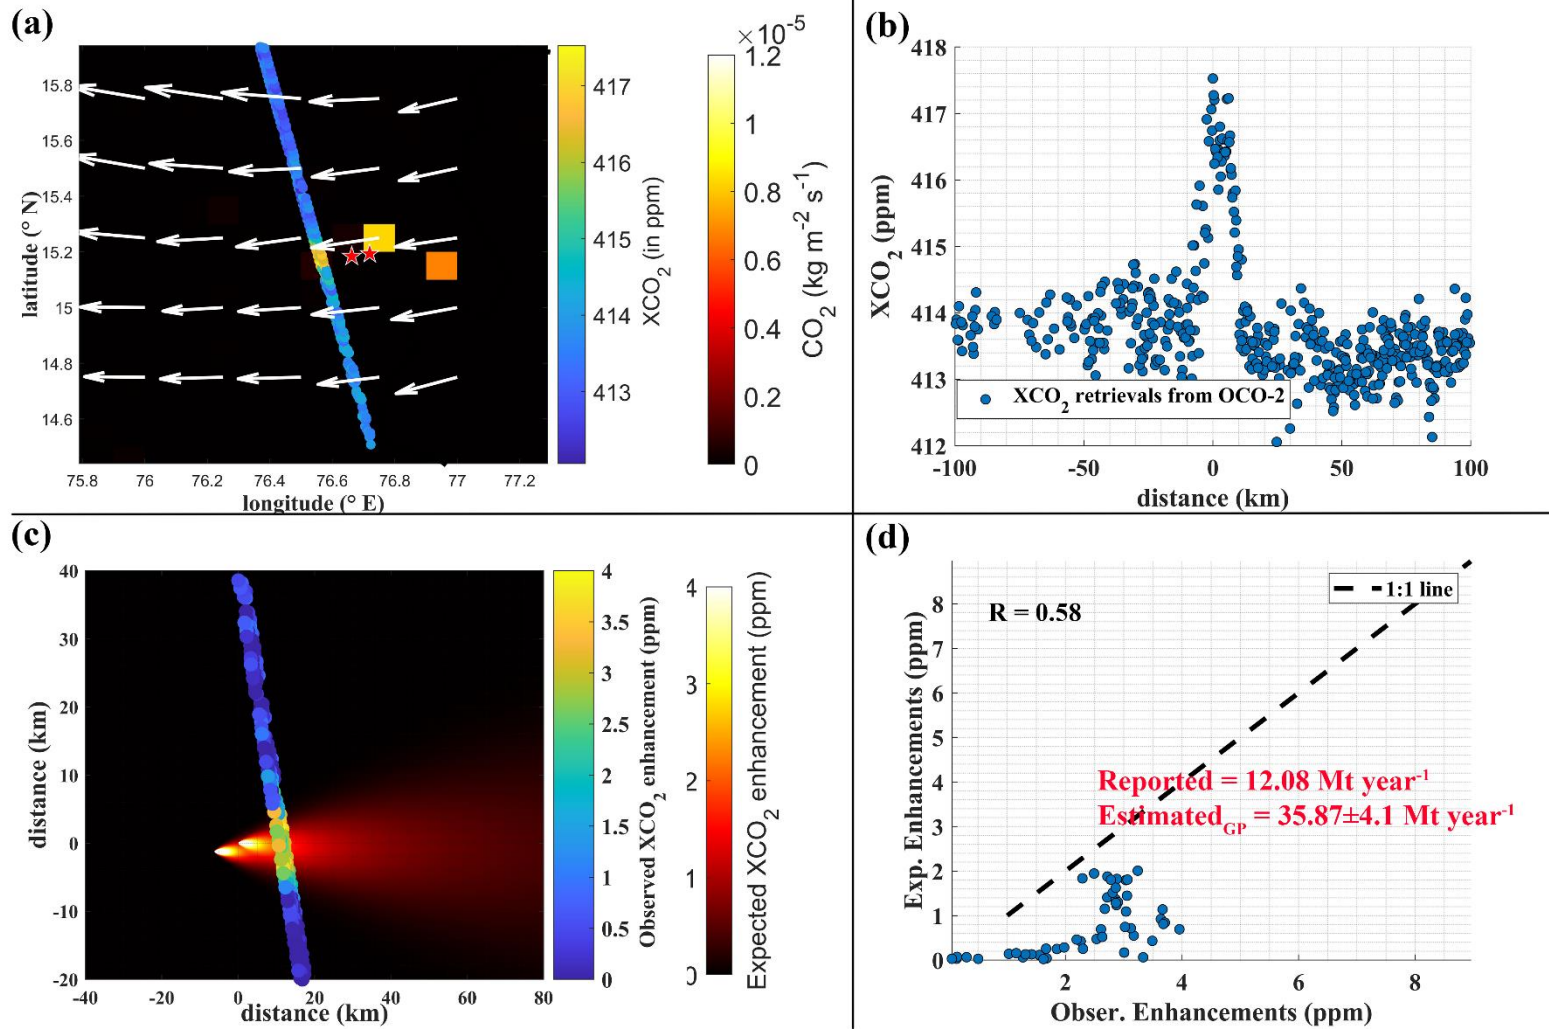



## Cluster 12 on “24 February 2015”

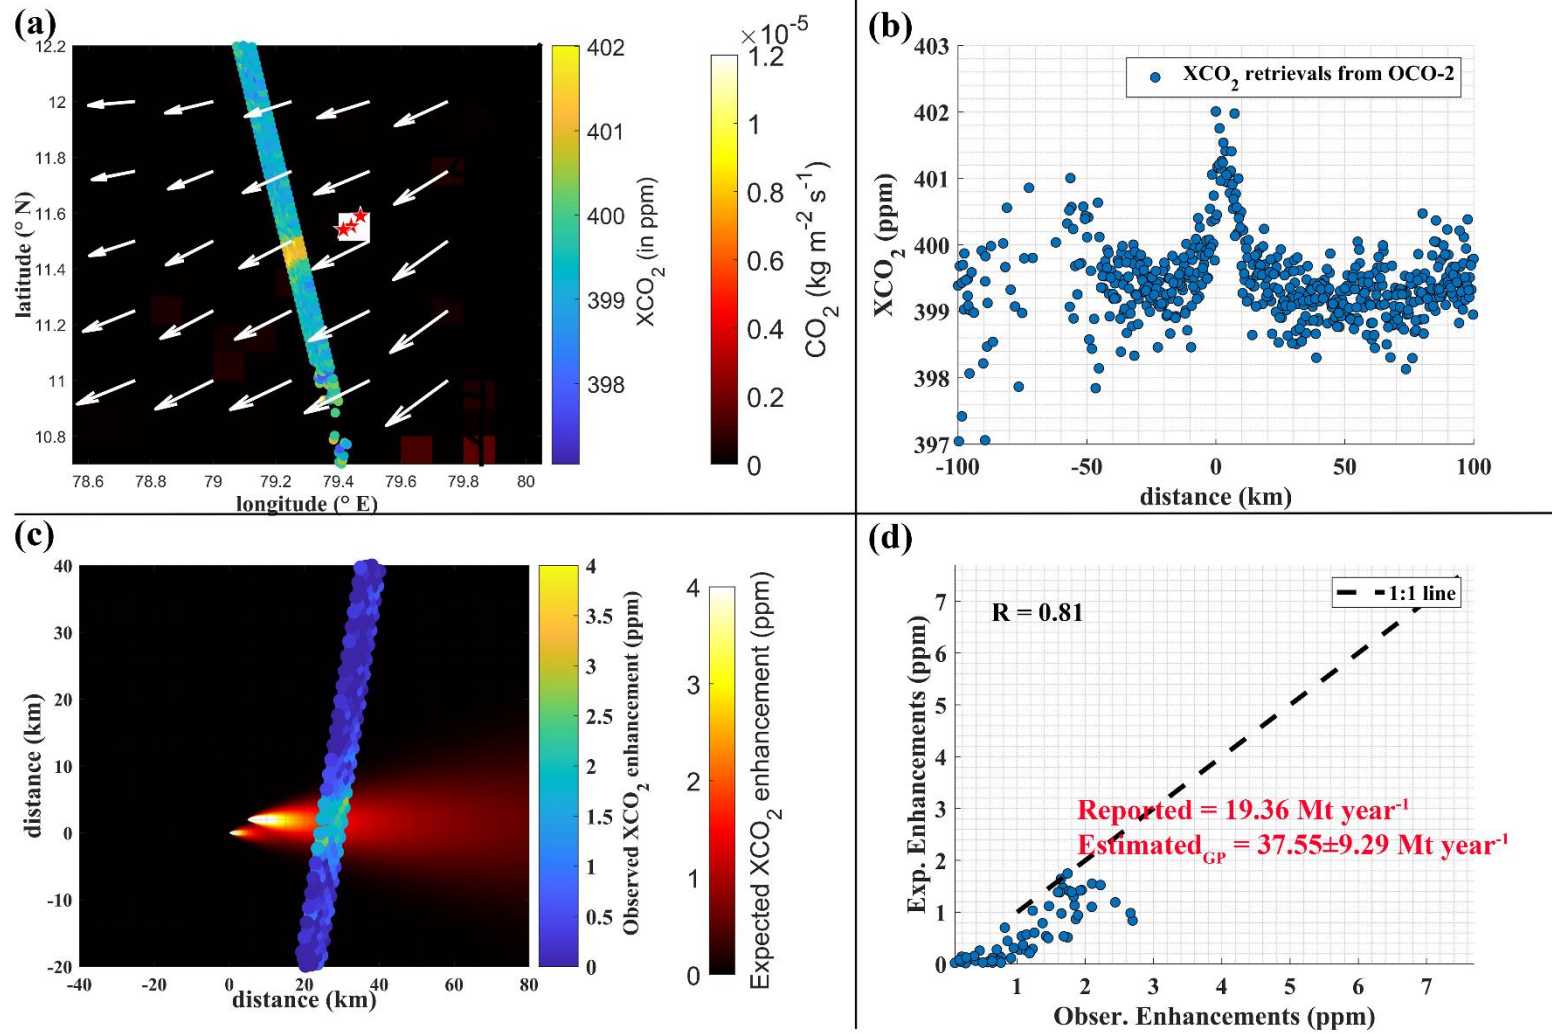

# Kawai Thermal Power Project on “30 January 2017”

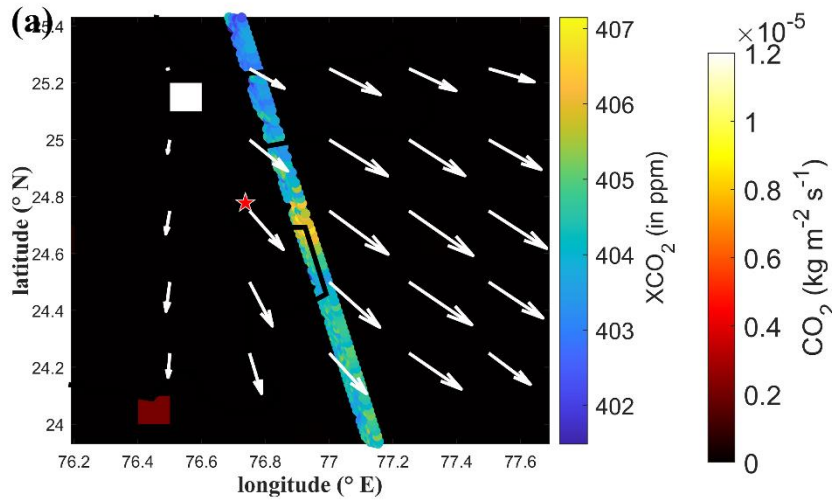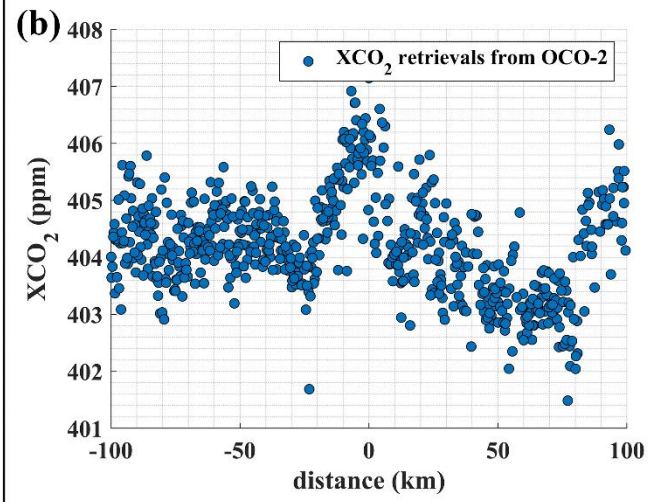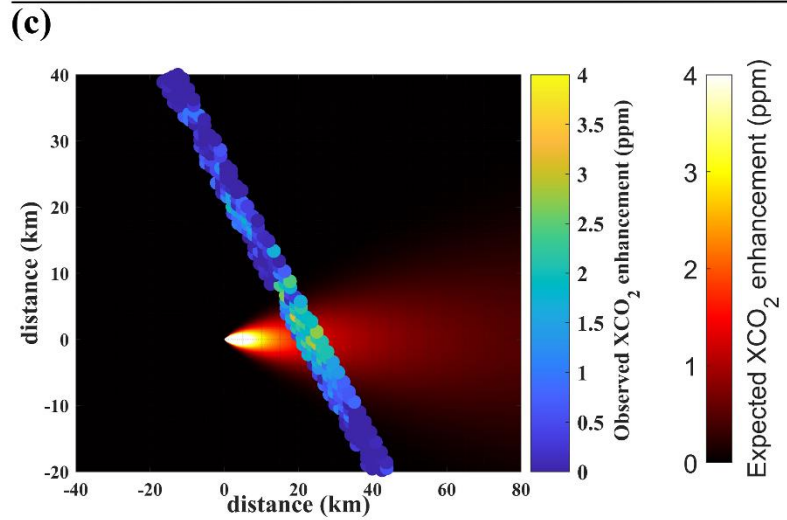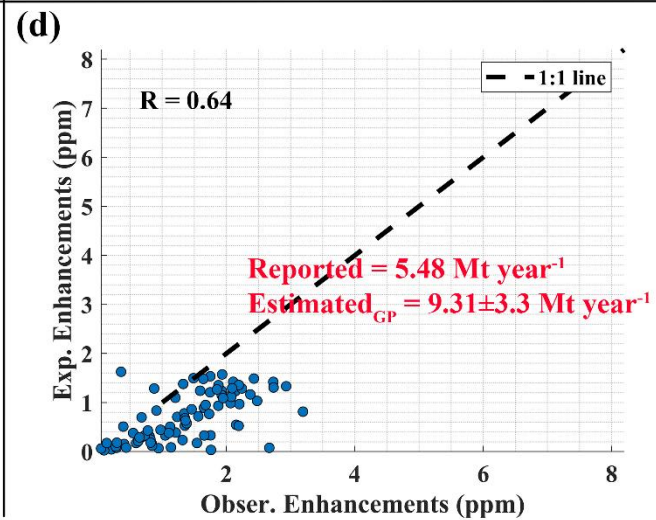

Supplement: EFT2-12-0-s001.pdf [file EFT2-12-0-s001.pdf]
